# Supplementary material for: Cyclooctyne-based reagents for uncatalyzed click chemistry: A computational survey
Source: Royal Society of Chemistry journal article supplement (doi:10.1039/b911482c), 2009-01-01
Supplement: b911482c.pdf [file b911482c.pdf]

**Supporting information** for the manuscript “Cyclooctyne-based Reagents for Uncatalyzed Click Chemistry: A Computational Survey” by Kimberly Chenoweth, David M. Chenoweth, and William A. Goddard, III

**Figure S1.** Activation energy dependence on transannular H-H repulsion, alkyne angle, transannular hybridization induced ring strain (THIRS) angle and THIRS distance.

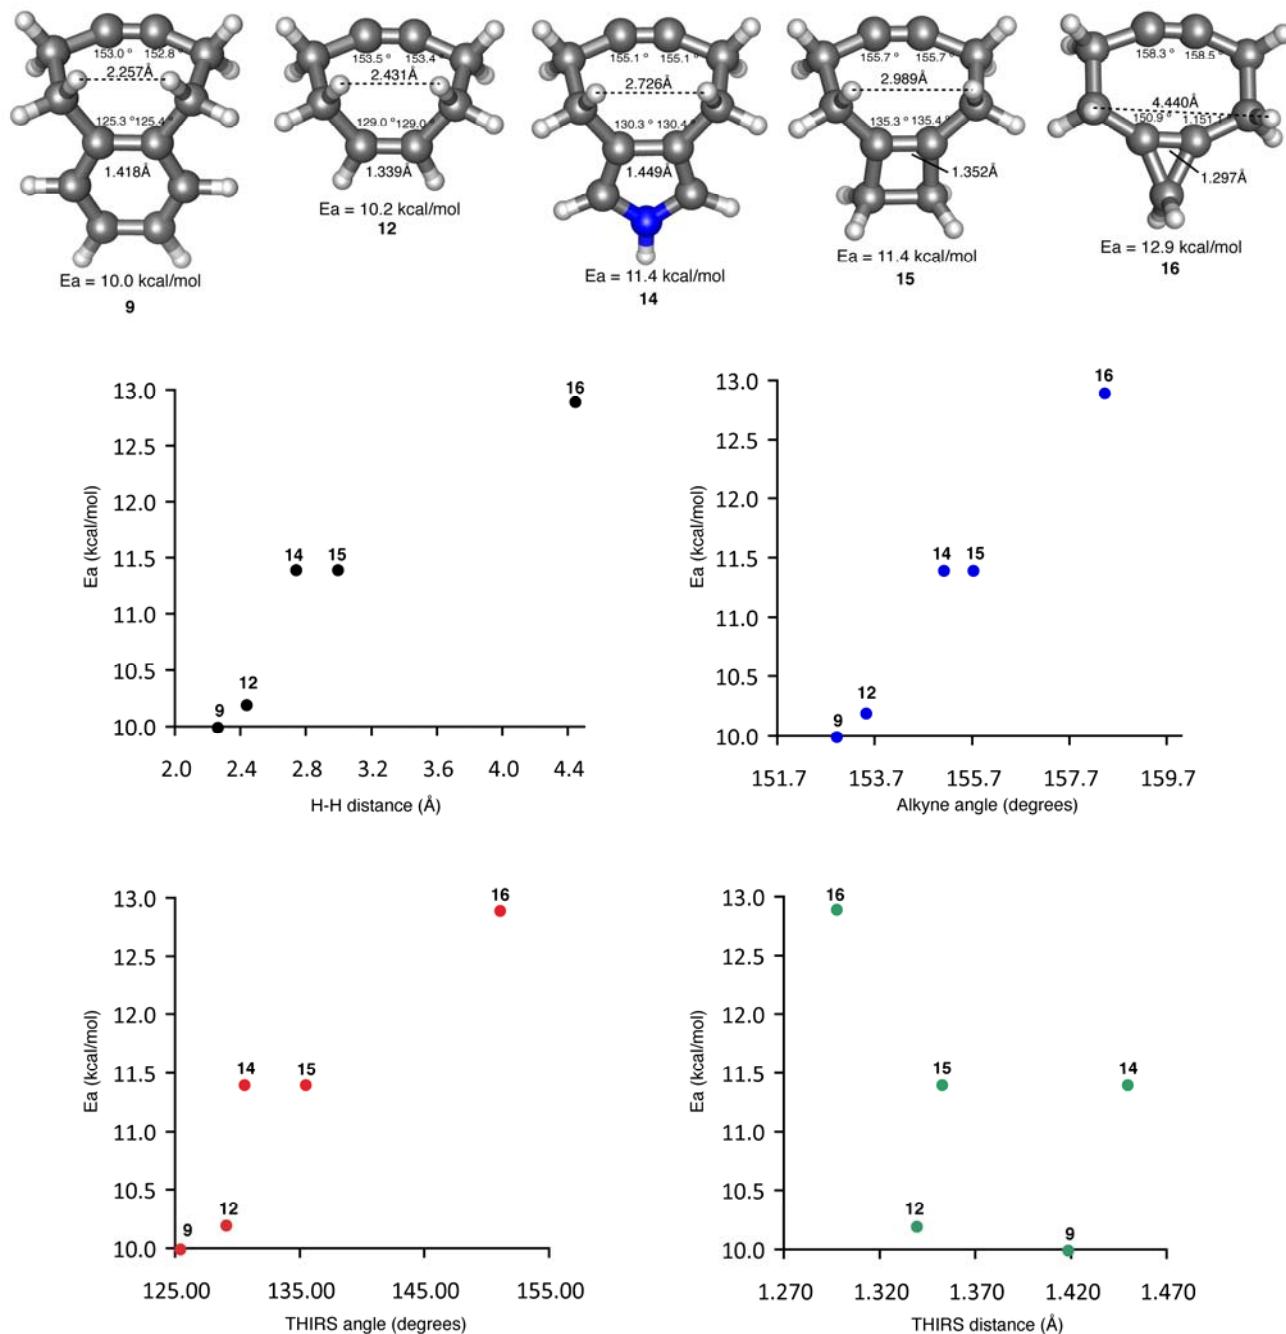

Table 1. Solvation free energies for reported transition states.<sup>a</sup>

| Structure | $\Delta G^\ddagger$ (kcal/mol) |
|-----------|--------------------------------|
| 1a-ts1    | 25.2                           |
| 1b-ts1    | 28.1                           |
| 1b-ts2    | 27.6                           |
| 1c-ts1    | 28.5                           |
| 1c-ts2    | 27.3                           |
| 1d-ts1    | 26.9                           |
| 1d-ts2    | 25.3                           |
| 1e-ts1    | 25.8                           |
| 1e-ts2    | 25.4                           |
| 4-ts1     | 27.3                           |
| 4-ts2     | 28.2                           |
| 7a-ts3    | 28.2                           |
| 7b-ts3    | 27.7                           |
| 7c-ts3    | 26.6                           |
| 7d-ts3    | 26.9                           |
| 7e-ts3    | 28.2                           |
| 7f-ts3    | 27.8                           |
| 7g-ts3    | 27.5                           |
| 7h-ts3    | 26.9                           |
| 7i-ts3    | 27.5                           |
| 9-ts1     | 27.1                           |
| 9-ts2     | 27.4                           |
| 10-ts1    | 25.4                           |
| 10-ts2    | 25.4                           |
| 11-ts     | 24.7                           |
| 12-ts1    | 23.0                           |
| 12-ts2    | 22.7                           |

<sup>a</sup> We considered single-point solvent effects for H<sub>2</sub>O (probe radius = 1.40 Å,  $\epsilon$  = 80.37) using the Jaguar self consistent Poisson-Boltzmann solver.<sup>[1]</sup>

[1] (a)Marten, B.; Kim, K.; Cortis, C.; Friesner, R. A.; Murphy, R. B.; Ringnalda, M. N.; Sitkoff, D.; Honig, B. *J. Phys. Chem.* 1996, 100, 11775-11788. (b)Tannor, D. J.; Marten, B.; Murphy, R.; Friesner, R. A.; Sitkoff, D.; Nicholls, A.; Ringnalda, M.; Goddard, W. A., III; Honig, B. *J. Am. Chem. Soc.* 1994, 116, 11875-11882.

Table 2. Absolute energies in hartrees for the structures discussed in the manuscript:

| Structure                         | E, 0K (au)    | H, 298K (au)  | G, 298K (au)  |
|-----------------------------------|---------------|---------------|---------------|
| Methyl Azide                      | -204.1483611  | -204.0928010  | -204.1248090  |
| Cyclooctyne-based reagents        |               |               |               |
| 1a(chair)                         | -312.0842369  | -311.8961110  | -311.9366560  |
| 1a(twist boat)                    | -312.0791294  | -311.8909040  | -311.9310190  |
| 1a-TS1                            | -516.2121881  | -515.9680420  | -516.0218050  |
| 2a                                | -516.3452111  | -516.0958350  | -516.1443020  |
| 1b                                | -351.4095202  | -351.1921000  | -351.2359340  |
| 1b-TS1                            | -555.5359947  | -555.2624540  | -555.3191660  |
| 1b-TS2                            | -555.5362178  | -555.2626880  | -555.3191790  |
| 2b                                | -555.6700981  | -555.3913990  | -555.4428700  |
| 3b                                | -555.6699371  | -555.3912350  | -555.4427080  |
| 1c                                | -450.6763779  | -450.4665740  | -450.5122060  |
| 1c-TS1                            | -654.8028876  | -654.5368670  | -654.5954000  |
| 1c-TS2                            | -654.8066775  | -654.5405590  | -654.5976820  |
| 2c                                | -654.9368248  | -654.6657240  | -654.7188900  |
| 3c                                | -654.9391145  | -654.6679650  | -654.7209290  |
| 2c-cation                         | -554.8077383  |               |               |
| 3c-cation                         | -554.7874778  |               |               |
| 2c-OH                             | -630.9134748  |               |               |
| 3c-OH                             | -630.9093730  |               |               |
| 1d                                | -411.3459097  | -411.1647520  | -411.2073990  |
| 1d-TS1                            | -615.4742510  | -615.2369180  | -615.2930510  |
| 1d-TS2                            | -615.4775560  | -615.2401600  | -615.2949600  |
| 2d                                | -615.6117781  | -615.3692380  | -615.4195370  |
| 3d                                | -615.6062492  | -615.3637320  | -615.4140800  |
| 1e                                | -510.6201228  | -510.4465050  | -510.4908400  |
| 1e-TS1                            | -714.7492058  | -714.5194760  | -714.5764110  |
| 1e-TS2                            | -714.7536736  | -714.5237890  | -714.5803590  |
| 2e                                | -714.8819432  | -714.6471580  | -714.6992600  |
| 3e                                | -714.8878955  | -714.6530400  | -714.7050760  |
| Azacyclooctyne-based reagent      |               |               |               |
| 4                                 | -670.5797997  | -670.3215930  | -670.378652   |
| 4-TS1                             | -874.7072534  | -874.3929740  | -874.463613   |
| 4-TS2                             | -874.7100682  | -874.3955880  | -874.464335   |
| 5                                 | -874.8420105  | -874.5226710  | -874.587940   |
| 6                                 | -874.8394445  | -874.5201890  | -874.585113   |
| Dibenzocyclooctyne-based reagents |               |               |               |
| 7a                                | -727.7601922  | -727.4844510  | -727.5409520  |
| 7a-TS3                            | -931.8891763  | -931.5571190  | -931.6251700  |
| 8a                                | -932.0138261  | -931.6772160  | -931.7424240  |
| 7b                                | -846.1195417  | -845.8099650  | -845.8724730  |
| 7b-TS3                            | -1050.2493899 | -1049.8834470 | -1049.9575560 |
| 8b                                | -1050.3734484 | -1050.0030060 | -1050.0742780 |
| 7c                                | -924.7795566  | -924.4108590  | -924.4805820  |
| 7c-TS3                            | -1128.9093494 | -1128.4842890 | -1128.5654230 |
| 8c                                | -1129.0333441 | -1128.6037830 | -1128.6820650 |
| 7d                                | -885.0163936  | -884.6227540  | -884.6938870  |
| 7d-TS3                            | -1089.1453407 | -1088.6954220 | -1088.7777520 |
| 8d                                | -1089.2698416 | -1088.8154080 | -1088.8951550 |
| 7e                                | -617.0126140  | -616.7728400  | -616.8230870  |
| 7e-TS3                            | -821.1414241  | -820.8452620  | -820.9072380  |

|                                 |               |               |               |
|---------------------------------|---------------|---------------|---------------|
| 8e                              | -821.2659730  | -820.9653330  | -821.0246460  |
| 7f                              | -815.5408452  | -815.3158180  | -815.3703910  |
| 7f-TS3                          | -1019.6703613 | -1019.3889400 | -1019.4549650 |
| 8f                              | -1019.7947494 | -1019.5088560 | -1019.5723970 |
| 7g                              | -1536.2558408 | -1536.0327740 | -1536.0903890 |
| 7g-TS3                          | -1740.3856264 | -1740.1061610 | -1740.1753810 |
| 8g                              | -1740.5095767 | -1740.2266100 | -1740.2896230 |
| 7h                              | -1026.1237271 | -1025.8738790 | -1025.9396460 |
| 7h-TS3                          | -1230.2541634 | -1229.9478830 | -1230.0244100 |
| 8h                              | -1230.3766352 | -1230.0668160 | -1230.1371910 |
| 7i                              | -801.5408508  | -801.3001790  | -801.3596720  |
| 7i-TS3                          | -1005.6711994 | -1005.3741260 | -1005.4451860 |
| 8i                              | -1005.7939718 | -1005.4934000 | -1005.5585190 |
| Benzocyclooctyne-based reagents |               |               |               |
| 9                               | -464.5469108  | -464.3329620  | -464.3783940  |
| 9-TS1                           | -668.6750100  | -668.4048720  | -668.4628350  |
| 9-TS2                           | -668.6760986  | -668.4059680  | -668.4635140  |
| 9-P1                            | -668.8110984  | -668.5361220  | -668.5896890  |
| 9-P2                            | -668.8117863  | -668.5367780  | -668.5904450  |
| 10                              | -464.5381188  | -464.3242390  | -464.3697710  |
| 10-TS1                          | -668.6689380  | -668.3989680  | -668.4574510  |
| 10-TS2                          | -668.6683946  | -668.3984670  | -668.4571470  |
| 10-P1                           | -668.8078110  | -668.5328130  | -668.5863600  |
| 10-P2                           | -668.8076293  | -668.5326490  | -668.5860820  |
| 11                              | -464.5415290  | -464.3276420  | -464.3726070  |
| 11-TS                           | -668.6739234  | -668.4039440  | -668.4621740  |
| 11-P                            | -668.8034698  | -668.5284550  | -668.5824210  |
| 12                              | -663.0762414  | -662.8769060  | -662.9256960  |
| 12-TS1                          | -867.2100983  | -866.9546130  | -867.0159770  |
| 12-TS2                          | -867.2138419  | -866.9582450  | -867.0191440  |
| 12-P1                           | -867.3407136  | -867.0804250  | -867.1375450  |
| 12-P2                           | -867.3400537  | -867.0797350  | -867.1366450  |

Cartesian coordinates for the structures discussed in the manuscript:

Methyl Azide

C 0.00028 -0.00010 0.00019  
 N -0.00014 -0.00125 1.47353  
 N 1.10317 0.00002 2.01502  
 N 2.05542 0.00114 2.63362  
 H 0.49026 -0.89215 -0.40424  
 H 0.48937 0.89299 -0.40293  
 H -1.04179 -0.00042 -0.31121

1a(chair)

C -0.03950 0.15245 -0.00472  
 H -0.26180 0.32514 1.05313  
 C 1.19045 -0.60281 -0.21033  
 C 1.92672 -1.41500 -0.70766  
 C 2.33295 -2.50908 -1.58147  
 C 1.27378 -2.60918 -2.71415  
 C -0.20610 -2.57205 -2.25407  
 C -0.90398 -1.18152 -2.09677  
 C -1.19026 -0.65516 -0.66684  
 H 0.04274 1.14032 -0.47316  
 H 2.36801 -3.44835 -1.01687  
 H 3.32951 -2.36424 -2.01067  
 H 1.45342 -3.54150 -3.26106  
 H 1.44729 -1.79399 -3.42473  
 H -0.31002 -3.14194 -1.32357  
 H -0.77489 -3.13032 -3.00431  
 H -1.87463 -1.25448 -2.59739  
 H -0.34243 -0.42394 -2.65541  
 H -2.07842 -0.01402 -0.69425  
 H -1.43838 -1.50168 -0.01778

1a(twist boat)

C 0.00112 -0.00006 0.00192  
 C 0.00080 -0.00084 1.20696  
 C 0.62581 0.00126 2.52775  
 C 2.11827 0.36447 2.30034  
 C 2.98797 -0.63776 1.50306  
 C 2.57172 -1.18011 0.10635  
 C 2.18070 -0.17634 -1.01211  
 C 0.64942 -0.13622 -1.30147  
 H 0.16893 0.72892 3.20630  
 H 0.52987 -0.97959 3.00823  
 H 2.59833 0.49759 3.27746  
 H 2.14086 1.34293 1.81094  
 H 3.15609 -1.51873 2.13517  
 H 3.97218 -0.16460 1.39917  
 H 1.75943 -1.90145 0.23033  
 H 3.43020 -1.76435 -0.24264  
 H 2.69989 -0.43370 -1.94139  
 H 2.50484 0.83453 -0.74511  
 H 0.33601 -1.06179 -1.79822  
 H 0.40869 0.68489 -1.98374

1a-TS1

C 0.00425 0.00528 0.01911  
 N -0.00767 0.00685 2.18858  
 C 1.19054 -0.00426 -0.30844  
 N 2.22137 0.01732 1.74653  
 C -1.42021 -0.00483 -0.34872  
 H -2.00172 -0.58759 0.37164  
 C 2.29057 0.01418 -1.27542  
 C 1.77661 0.45781 -2.66366  
 C 0.58623 -0.34114 -3.24171  
 C -0.85728 0.13431 -2.90915  
 C -1.62669 -0.56947 -1.76869  
 H -1.81066 1.01912 -0.29496  
 H 2.73774 -0.98524 -1.34809

H 3.08884 0.68864 -0.95164  
 H 2.61968 0.38471 -3.36013  
 H 1.50814 1.51883 -2.61498  
 H 0.69268 -1.40106 -2.97959  
 H 0.68620 -0.29878 -4.33105  
 H -1.45074 -0.01265 -3.81748  
 H -0.85416 1.21755 -2.73469  
 H -2.69911 -0.51306 -1.98862  
 H -1.37041 -1.63509 -1.76565  
 N 1.13945 -0.04101 2.37723  
 C 3.44016 -0.50560 2.35751  
 H 3.73376 0.07404 3.23869  
 H 3.35020 -1.56162 2.63500  
 H 4.22882 -0.40848 1.61161

2a

C -0.00370 0.08085 -0.05363  
 H -0.03308 0.15717 1.04000  
 C 1.42740 0.01531 -0.49934  
 C 2.20541 -1.03304 -0.96074  
 C 1.93974 -2.47895 -1.25791  
 C 1.17099 -2.72922 -2.58036  
 C -0.36131 -2.64649 -2.50776  
 C -0.98023 -1.32317 -2.02270  
 C -0.90737 -1.07914 -0.49326  
 H -0.41300 1.02617 -0.42487  
 N 2.19461 1.14401 -0.48213  
 N 3.39209 0.86541 -0.89654  
 N 3.41973 -0.44928 -1.19673  
 C 4.65334 -1.03628 -1.68857  
 H 1.40275 -2.93861 -0.42409  
 H 2.89866 -3.00162 -1.31143  
 H 1.43006 -3.73182 -2.93791  
 H 1.53935 -2.02859 -3.33827  
 H -0.73181 -3.46000 -1.87042  
 H -0.74243 -2.85899 -3.51293  
 H -2.03156 -1.32584 -2.32537  
 H -0.51917 -0.48477 -2.55718  
 H -1.91129 -0.86611 -0.11450  
 H -0.60035 -1.99925 0.01412  
 H 5.38591 -0.23278 -1.72436  
 H 4.51993 -1.45044 -2.69028  
 H 5.00963 -1.82007 -1.01639

1b

C 0.02626 0.01895 0.03144  
 C -0.00073 -0.01672 1.56672  
 C 1.36562 -0.00404 -0.55506  
 C 2.24726 -0.29301 -1.32250  
 C 2.88499 -0.94496 -2.45972  
 C 1.75098 -1.44851 -3.39472  
 C 0.58931 -2.19834 -2.69436  
 C -0.60459 -1.36290 -2.12788  
 C -0.72818 -1.19184 -0.59260  
 H -0.47797 0.93732 -0.29701  
 H -1.03158 -0.03046 1.93211  
 H 0.49936 0.85875 1.98711  
 H 0.50801 -0.90883 1.94138  
 H 3.49147 -1.79152 -2.11617  
 H 3.55884 -0.27982 -3.00906  
 H 2.20061 -2.10925 -4.14427  
 H 1.34409 -0.59065 -3.94078  
 H 0.99664 -2.83928 -1.90385  
 H 0.17243 -2.88256 -3.44016  
 H -1.52307 -1.85991 -2.45604  
 H -0.62022 -0.37607 -2.60471  
 H -1.78804 -1.08931 -0.33144

H -0.37463 -2.10495 -0.09926

1b-TS1

C 0.00337 -0.00668 -0.00586  
N 0.00724 -0.00708 2.17441  
C 1.19394 -0.00629 -0.32682  
N 2.22638 -0.02929 1.69885  
C -1.42778 0.04000 -0.38128  
C -2.28314 -1.02264 0.32832  
C 2.30512 0.09302 -1.28119  
C 1.89738 0.91272 -2.52443  
C 0.64959 0.43068 -3.29206  
C -0.74811 0.88687 -2.78826  
C -1.56528 -0.09331 -1.91724  
H -1.81140 1.02689 -0.08970  
H -3.32708 -0.93816 0.01253  
H -2.23499 -0.90538 1.41014  
H -1.93244 -2.02819 0.07840  
H 2.61263 -0.91465 -1.58869  
H 3.18086 0.55826 -0.82150  
H 2.75239 0.90517 -3.21031  
H 1.75232 1.95621 -2.22348  
H 0.66997 -0.66317 -3.37596  
H 0.75607 0.80344 -4.31603  
H -1.35080 1.08939 -3.67928  
H -0.65593 1.85032 -2.27282  
H -2.62847 0.03406 -2.15204  
H -1.31400 -1.12348 -2.19728  
N 1.15606 -0.07382 2.35058  
C 3.44411 -0.59595 2.27178  
H 3.77675 -0.03494 3.15112  
H 3.32987 -1.65200 2.53938  
H 4.21631 -0.51254 1.50697

1b-TS2

C -0.02701 0.09052 -0.03802  
N 0.00245 0.04223 2.28649  
C 1.18235 0.09658 -0.27580  
N 2.17064 0.03394 1.61175  
C -1.45128 0.11266 -0.39732  
C -2.24411 -1.07341 0.17526  
C 2.28391 0.22006 -1.24750  
C 1.91398 1.17842 -2.39695  
C 0.66484 0.81956 -3.22834  
C -0.73685 1.21905 -2.68707  
C -1.56158 0.14211 -1.94524  
H -1.89331 1.04033 -0.01016  
H -3.29576 -1.00760 -0.11822  
H -2.18358 -1.09680 1.26357  
H -1.84195 -2.01835 -0.19963  
H 2.51409 -0.77278 -1.65403  
H 3.19559 0.56929 -0.75576  
H 2.77502 1.21917 -3.07426  
H 1.79651 2.18890 -1.98920  
H 0.67459 -0.25379 -3.45682  
H 0.78555 1.32325 -4.19318  
H -1.33079 1.52585 -3.55365  
H -0.64787 2.11482 -2.06132  
H -2.62239 0.28006 -2.18368  
H -1.28894 -0.84879 -2.32642  
N 1.25583 0.08445 2.33143  
C -0.76221 0.57387 3.41328  
H -0.53945 1.62895 3.60839  
H -1.81534 0.48586 3.14797  
H -0.59352 -0.00386 4.32779

2b

C -0.00056 0.00949 0.04482  
C 0.04750 -0.17270 1.57370  
C 1.39076 0.02622 -0.53017

C 2.11085 -0.90300 -1.26245  
C 1.79940 -2.25253 -1.83945  
C 0.94627 -2.21319 -3.13199  
C -0.57472 -2.11319 -2.94176  
C -1.10766 -0.91197 -2.14018  
C -0.94330 -1.01869 -0.60261  
H -0.41183 1.00800 -0.14980  
N 2.18318 1.12028 -0.33096  
N 3.33975 0.93245 -0.88794  
N 3.31574 -0.28761 -1.46247  
C 4.49707 -0.76250 -2.16049  
H -0.95254 -0.07974 2.00825  
H 0.69304 0.58113 2.02767  
H 0.44193 -1.15966 1.83647  
H 1.30637 -2.87484 -1.08843  
H 2.74314 -2.75738 -2.06335  
H 1.15013 -3.12705 -3.70082  
H 1.29181 -1.38032 -3.75494  
H -0.93661 -3.03665 -2.47120  
H -1.02388 -2.09239 -3.94106  
H -2.17236 -0.81166 -2.37080  
H -0.63736 0.00860 -2.50384  
H -1.92154 -0.89624 -0.12761  
H -0.61976 -2.02919 -0.32940  
H 5.23422 0.03543 -2.10072  
H 4.27546 -0.97398 -3.20863  
H 4.89845 -1.66093 -1.68606

3b

C 0.04247 -0.01045 0.10491  
C 0.13510 -0.31580 1.61478  
C 1.40225 0.00099 -0.53781  
C 2.11088 -0.91203 -1.30205  
C 1.75502 -2.25628 -1.86799  
C 0.87486 -2.19798 -3.13854  
C -0.63955 -2.04112 -2.93091  
C -1.11427 -0.83281 -2.10275  
C -0.93618 -0.98928 -0.57216  
H -0.38010 0.99730 -0.00609  
N 2.26073 1.05901 -0.42442  
N 3.41974 0.81495 -1.07163  
N 3.32839 -0.36698 -1.59755  
H -0.85519 -0.27052 2.07690  
H 0.78134 0.39223 2.13823  
H 0.54173 -1.31761 1.77681  
H 1.29048 -2.89917 -1.11426  
H 2.70648 -2.72410 -2.13146  
H 1.03470 -3.12125 -3.70628  
H 1.24556 -1.38406 -3.77125  
H -1.03706 -2.95449 -2.46912  
H -1.10133 -1.98468 -3.92306  
H -2.17633 -0.67889 -2.31567  
H -0.60542 0.07254 -2.45252  
H -1.90343 -0.85980 -0.07686  
H -0.62694 -2.01235 -0.33764  
C 2.07911 2.34005 0.23428  
H 1.19427 2.85190 -0.15027  
H 1.98522 2.22075 1.31548  
H 2.96451 2.93201 0.01212

1c

C 0.03817 -0.01787 0.03310  
C -0.00328 -0.01327 1.55508  
C 1.37821 -0.01855 -0.54919  
C 2.24908 -0.30826 -1.32736  
C 2.88079 -0.94419 -2.47498  
C 1.74317 -1.43194 -3.41420  
C 0.58140 -2.18622 -2.71892  
C -0.59882 -1.34767 -2.13168  
C -0.71571 -1.21253 -0.59489

F -0.63479 1.16017 -0.39794  
H -1.03911 -0.04914 1.89982  
H 0.46198 0.89831 1.93342  
H 0.53663 -0.87357 1.95650  
H 3.48554 -1.79482 -2.13973  
H 3.55615 -0.27019 -3.01078  
H 2.19115 -2.08389 -4.17201  
H 1.33779 -0.56600 -3.94738  
H 0.99017 -2.84520 -1.94358  
H 0.15472 -2.85441 -3.47337  
H -1.52724 -1.81801 -2.46924  
H -0.60272 -0.34420 -2.56734  
H -1.76821 -1.08289 -0.32131  
H -0.36803 -2.13005 -0.10813

#### 1c-TS1

C 0.00306 -0.01033 -0.00572  
N 0.00309 0.01190 2.18038  
C 1.19381 -0.01407 -0.32650  
N 2.21934 0.02422 1.68159  
C -1.41907 -0.00181 -0.42152  
C -2.31344 -0.92179 0.40064  
C 2.31273 0.04475 -1.27429  
C 1.89978 0.73221 -2.59280  
C 0.67872 0.13931 -3.32378  
C -0.73229 0.60771 -2.87727  
C -1.53681 -0.30179 -1.92681  
F -1.91104 1.32006 -0.23516  
H -3.33533 -0.87658 0.01758  
H -2.30570 -0.61101 1.44323  
H -1.95792 -1.95326 0.34139  
H 2.66137 -0.97516 -1.48122  
H 3.16117 0.58086 -0.84133  
H 2.76603 0.68787 -3.26246  
H 1.71689 1.79330 -2.39256  
H 0.73187 -0.95674 -3.30028  
H 0.78760 0.41286 -4.37799  
H -1.33392 0.71405 -3.78475  
H -0.67815 1.61003 -2.44189  
H -2.60125 -0.20742 -2.16465  
H -1.27030 -1.35209 -2.08693  
N 1.15340 -0.03638 2.33939  
C 3.43482 -0.57951 2.22249  
H 3.30594 -1.64073 2.46110  
H 4.19942 -0.48447 1.45169  
H 3.78493 -0.04852 3.11301

#### 1c-TS2

C -0.00406 -0.01394 -0.02423  
N -0.00069 -0.00442 2.21581  
C 1.19205 -0.00120 -0.32070  
N 2.20241 0.02359 1.63426  
C -1.42620 -0.03925 -0.38296  
C -2.15953 -1.28044 0.11456  
C 2.26554 0.15590 -1.31386  
C 1.88410 1.20034 -2.38358  
C 0.59791 0.92862 -3.19085  
C -0.77474 1.28681 -2.55522  
C -1.58401 0.14426 -1.90476  
F -2.06296 1.08692 0.23046  
H -3.21609 -1.21930 -0.15638  
H -2.06725 -1.36312 1.19710  
H -1.72904 -2.17839 -0.33363  
H 2.44934 -0.81418 -1.79271  
H 3.20352 0.44469 -0.83287  
H 2.72254 1.26632 -3.08643  
H 1.80645 2.18230 -1.90383  
H 0.58825 -0.11921 -3.51806  
H 0.68554 1.51764 -4.10960  
H -1.39944 1.69147 -3.35698

H -0.65887 2.10142 -1.83389  
H -2.65261 0.31268 -2.07207  
H -1.33613 -0.80796 -2.38521  
N 1.24689 0.08890 2.28987  
C -0.82211 0.80940 3.11682  
H -0.51470 1.85929 3.11529  
H -1.83988 0.74906 2.73932  
H -0.79466 0.41805 4.13822

#### 2c

C 0.00137 0.02549 -0.01473  
C -0.09957 0.31979 1.47988  
C 1.44340 -0.04001 -0.44755  
C 2.21107 -1.05088 -1.00480  
C 1.95537 -2.46803 -1.42688  
C 1.12595 -2.63145 -2.72408  
C -0.39800 -2.63413 -2.54831  
C -1.02823 -1.36729 -1.95077  
C -0.84959 -1.17884 -0.42417  
F -0.57361 1.14875 -0.67512  
N 2.23629 1.05641 -0.26736  
N 3.43351 0.79995 -0.68543  
N 3.44125 -0.47302 -1.13787  
C 4.68096 -1.02908 -1.65315  
H -1.14198 0.49684 1.75358  
H 0.49061 1.20538 1.71526  
H 0.28314 -0.52140 2.06416  
H 1.47298 -3.01511 -0.61155  
H 2.92199 -2.95643 -1.57119  
H 1.41143 -3.58182 -3.18724  
H 1.41302 -1.84513 -3.43088  
H -0.68569 -3.50141 -1.93949  
H -0.83907 -2.80417 -3.53655  
H -2.09979 -1.39856 -2.16442  
H -0.65443 -0.48058 -2.46965  
H -1.82924 -1.02304 0.03455  
H -0.44153 -2.08030 0.04336  
H 5.41256 -0.22436 -1.63197  
H 4.55580 -1.37820 -2.67958  
H 5.03246 -1.85232 -1.02742

#### 3c

C 0.04002 -0.03572 0.09107  
C 0.11749 -0.26789 1.60070  
C 1.40064 0.00831 -0.54846  
C 2.10382 -0.90366 -1.31903  
C 1.75327 -2.24205 -1.90104  
C 0.86539 -2.17771 -3.16564  
C -0.64820 -2.05238 -2.93941  
C -1.13032 -0.86329 -2.09107  
C -0.91830 -1.02872 -0.56784  
F -0.54734 1.25801 -0.08935  
N 2.27054 1.05303 -0.39688  
N 3.42578 0.80331 -1.03951  
N 3.33171 -0.37015 -1.58598  
H -0.88409 -0.22476 2.03388  
H 0.73576 0.48764 2.08647  
H 0.55148 -1.24840 1.80834  
H 1.29876 -2.89948 -1.15281  
H 2.70842 -2.69670 -2.17301  
H 1.03942 -3.08798 -3.74951  
H 1.21571 -1.34599 -3.78633  
H -1.02312 -2.97986 -2.48643  
H -1.12404 -1.98995 -3.92428  
H -2.20023 -0.73122 -2.27283  
H -0.65781 0.06164 -2.43426  
H -1.87061 -0.90182 -0.04612  
H -0.57956 -2.04139 -0.33256  
C 2.11407 2.34099 0.26764  
H 1.24671 2.86622 -0.12583

H 1.99732 2.21208 1.34484  
H 3.02586 2.89914 0.06661

2c-cation

C 0.19328 -0.28029 0.10771  
C -0.36580 0.82642 0.92051  
C 1.51015 -0.23105 -0.31342  
C 2.30201 -1.14617 -1.08394  
C 1.98054 -2.43746 -1.75569  
C 0.99046 -2.30355 -2.94988  
C -0.49928 -2.47151 -2.62208  
C -1.16469 -1.40472 -1.74418  
C -0.72409 -1.40588 -0.23813  
N 2.33814 0.84464 0.02282  
N 3.48904 0.66616 -0.43968  
N 3.49101 -0.56995 -1.13718  
C 4.74009 -0.99802 -1.76810  
H -1.28480 1.18957 0.44319  
H 0.32985 1.64456 1.08050  
H -0.68814 0.41589 1.88713  
H 1.57841 -3.13446 -1.01300  
H 2.91209 -2.87956 -2.11019  
H 1.25955 -3.08493 -3.66404  
H 1.16214 -1.35242 -3.46430  
H -0.65760 -3.45682 -2.16796  
H -1.03790 -2.49286 -3.57391  
H -2.24132 -1.58425 -1.75351  
H -1.02205 -0.41032 -2.17902  
H -1.60776 -1.33206 0.39523  
H -0.24684 -2.36217 -0.00261  
H 5.44485 -0.17837 -1.64930  
H 4.57893 -1.19438 -2.82770  
H 5.12651 -1.88825 -1.27097

3c-cation

C 0.16266 -0.19563 0.04105  
C -0.56898 0.94974 0.64780  
C 1.50730 -0.18162 -0.28225  
C 2.29074 -1.12911 -1.03311  
C 1.94056 -2.38994 -1.74940  
C 0.94264 -2.23858 -2.93075  
C -0.54271 -2.45214 -2.60961  
C -1.22049 -1.41730 -1.70643  
C -0.67321 -1.40054 -0.22974  
N 2.45840 0.81287 0.02572  
N 3.62309 0.47809 -0.44385  
N 3.53649 -0.66856 -1.11134  
H -1.58038 0.98913 0.23407  
H -0.09607 1.91850 0.53155  
H -0.69918 0.74753 1.72101  
H 1.57260 -3.13801 -1.03751  
H 2.89124 -2.76587 -2.12889  
H 1.22719 -2.98883 -3.67149  
H 1.09475 -1.26909 -3.41630  
H -0.67632 -3.44756 -2.17026  
H -1.09043 -2.46739 -3.55649  
H -2.28622 -1.64553 -1.64830  
H -1.14620 -0.41929 -2.15041  
H -1.51800 -1.38061 0.46033  
H -0.11660 -2.31813 -0.03905  
C 2.38738 2.03958 0.83260  
H 1.93676 1.82700 1.80058  
H 3.41458 2.36940 0.96702  
H 1.82528 2.80845 0.30294

2c-OH

C -0.01658 0.03223 0.02590  
C -0.04722 0.09939 1.56417  
C 1.41853 -0.04131 -0.45137  
C 2.21818 -1.06867 -0.91485

C 1.98009 -2.51796 -1.21169  
C 1.22930 -2.77050 -2.54341  
C -0.30298 -2.66870 -2.49194  
C -0.91361 -1.34124 -2.00719  
C -0.89224 -1.12487 -0.47562  
O -0.60355 1.22859 -0.50594  
N 2.15119 1.10729 -0.45201  
N 3.35052 0.86591 -0.88586  
N 3.41000 -0.44906 -1.17367  
C 4.65569 -1.00888 -1.67022  
H -1.07763 0.22631 1.90475  
H 0.54145 0.95216 1.90897  
H 0.36795 -0.80718 2.01487  
H 1.43600 -2.98130 -0.38451  
H 2.94611 -3.02860 -1.25196  
H 1.48539 -3.77779 -2.88956  
H 1.61587 -2.07821 -3.29997  
H -0.69163 -3.48441 -1.86813  
H -0.66959 -2.87000 -3.50468  
H -1.95399 -1.31876 -2.34222  
H -0.43153 -0.49303 -2.50207  
H -1.90252 -0.89547 -0.12646  
H -0.59871 -2.04442 0.04025  
H 0.08703 1.90458 -0.48620  
H 5.35512 -0.18073 -1.76136  
H 4.51224 -1.47259 -2.64791  
H 5.05716 -1.74656 -0.97221

3c-OH

C 0.00767 0.02204 0.01778  
C -0.02488 0.02658 1.55169  
C 1.43689 0.01469 -0.49428  
C 2.22903 -0.96264 -1.08329  
C 1.99562 -2.39388 -1.47972  
C 1.19115 -2.60413 -2.78230  
C -0.33807 -2.56429 -2.65986  
C -0.93455 -1.28476 -2.05111  
C -0.79966 -1.17810 -0.51137  
O -0.65737 1.24311 -0.37370  
N 2.27013 1.10038 -0.41747  
N 3.48081 0.81225 -0.92606  
N 3.45914 -0.42213 -1.32600  
H -1.06131 0.05821 1.89469  
H 0.49111 0.89972 1.95275  
H 0.45591 -0.87034 1.94697  
H 1.54295 -2.96505 -0.66279  
H 2.99541 -2.80831 -1.62682  
H 1.46606 -3.58002 -3.19670  
H 1.52146 -1.85899 -3.51454  
H -0.67952 -3.42461 -2.06996  
H -0.75722 -2.70332 -3.66247  
H -1.99512 -1.24108 -2.31336  
H -0.47117 -0.42036 -2.54475  
H -1.79264 -1.08079 -0.06531  
H -0.37291 -2.09834 -0.10551  
H -0.73302 1.24183 -1.33448  
C 2.07508 2.41913 0.17455  
H 1.04966 2.74081 0.01816  
H 2.29309 2.39250 1.24506  
H 2.77629 3.09365 -0.31306

1d

C -0.14252 0.08244 0.02776  
H -0.41480 0.28236 1.06764  
C 1.09168 -0.67497 -0.11865  
C 1.82940 -1.49428 -0.60107  
C 2.26767 -2.56558 -1.48394  
C 1.27087 -2.61561 -2.67491  
C -0.23119 -2.57542 -2.29431  
C -0.91559 -1.18213 -2.11805



C -1.25809 -0.69967 -0.68793  
F -0.01029 1.34332 -0.59195  
H 2.25912 -3.51834 -0.94199  
H 3.28945 -2.41983 -1.84726  
H 1.47195 -3.53194 -3.24017  
H 1.49128 -1.77981 -3.34679  
H -0.39512 -3.18559 -1.39802  
H -0.76377 -3.09148 -3.09887  
H -1.86285 -1.21809 -2.66370  
H -0.32184 -0.40646 -2.61134  
H -2.12829 -0.03619 -0.72366  
H -1.53165 -1.55142 -0.05545

1d-TS1

C 0.01359 -0.00027 0.01418  
N -0.00347 0.01976 2.18730  
C 1.19856 -0.00093 -0.31621  
N 2.22523 -0.06095 1.73758  
C -1.40221 -0.06561 -0.37851  
H -2.03628 -0.38782 0.44996  
C 2.29118 -0.09238 -1.28397  
C 1.73264 0.00672 -2.72143  
C 0.61628 -1.00181 -3.08220  
C -0.86020 -0.56230 -2.87963  
C -1.60203 -0.97665 -1.59218  
F -1.84772 1.23036 -0.72622  
H 2.81445 -1.04606 -1.14903  
H 3.03387 0.69520 -1.12058  
H 2.57531 -0.13456 -3.40696  
H 1.36641 1.02527 -2.88677  
H 0.79669 -1.95236 -2.56516  
H 0.73048 -1.22323 -4.14782  
H -1.43391 -0.98892 -3.70799  
H -0.94369 0.52307 -2.99180  
H -2.67779 -0.98427 -1.79817  
H -1.32907 -1.99713 -1.30068  
N 1.14450 0.03262 2.36401  
C 3.45363 0.45819 2.33404  
H 3.75365 -0.12429 3.21073  
H 4.23279 0.35648 1.57903  
H 3.36931 1.51378 2.61248

1d-TS2

C -0.00018 0.00863 0.02374  
N 0.00759 0.00051 2.24162  
C 1.19029 0.00230 -0.29035  
N 2.22175 0.03472 1.69754  
C -1.42442 0.00755 -0.29676  
H -1.95668 -0.78360 0.23810  
C 2.25461 0.07667 -1.29967  
C 1.79198 0.86369 -2.54380  
C 0.51399 0.35428 -3.24502  
C -0.86631 0.83180 -2.71043  
C -1.66349 -0.12847 -1.80227  
F -2.00838 1.22604 0.14519  
H 2.53798 -0.94342 -1.58800  
H 3.15525 0.53518 -0.88193  
H 2.61594 0.84338 -3.26603  
H 1.65371 1.91403 -2.26466  
H 0.53383 -0.74211 -3.28856  
H 0.58155 0.68684 -4.28562  
H -1.49686 1.02603 -3.58290  
H -0.76207 1.79595 -2.20267  
H -2.73619 0.02743 -1.95572  
H -1.45507 -1.16837 -2.07807  
N 1.25339 0.09648 2.33197  
C -0.83598 0.80592 3.12781  
H -0.83543 0.40593 4.14618  
H -0.53160 1.85668 3.14223  
H -1.84550 0.74650 2.72640

2d

C 0.01239 0.44398 -0.84280  
H -0.12268 1.35849 -0.26207  
C 1.45311 0.07903 -0.66758  
C 2.29119 -0.84228 -1.27448  
C 2.14835 -1.82368 -2.39627  
C 0.71386 -2.06097 -2.88196  
C -0.24481 -2.65325 -1.81830  
C -1.37764 -1.71793 -1.36340  
C -1.02159 -0.59098 -0.38253  
F -0.25605 0.79369 -2.19185  
N 2.16255 0.73663 0.29754  
N 3.37575 0.28575 0.33116  
N 3.47382 -0.67022 -0.61919  
C 4.74612 -1.33425 -0.83855  
H 2.58500 -2.78165 -2.08515  
H 2.75608 -1.47836 -3.24281  
H 0.77457 -2.74176 -3.73552  
H 0.31091 -1.12258 -3.26489  
H 0.32367 -2.99358 -0.94379  
H -0.71150 -3.55099 -2.23441  
H -2.14964 -2.32365 -0.87648  
H -1.84953 -1.27759 -2.24741  
H -1.94595 -0.05171 -0.15115  
H -0.66244 -1.00938 0.56433  
H 5.43758 -0.94288 -0.09550  
H 5.12717 -1.12144 -1.83991  
H 4.64679 -2.41437 -0.71231

3d

C 0.02097 0.53066 -0.92214  
H -0.14159 1.47910 -0.40347  
C 1.44398 0.12080 -0.69634  
C 2.29244 -0.82673 -1.24521  
C 2.13301 -1.80624 -2.36901  
C 0.70276 -2.09191 -2.83812  
C -0.26085 -2.61162 -1.74143  
C -1.39149 -1.64214 -1.35769  
C -1.04493 -0.46269 -0.43572  
F -0.19405 0.81913 -2.28745  
N 2.20367 0.71407 0.27719  
N 3.42867 0.16331 0.32931  
N 3.48473 -0.75633 -0.58497  
H 2.61615 -2.73615 -2.05024  
H 2.72052 -1.44591 -3.22175  
H 0.76943 -2.83301 -3.63973  
H 0.28794 -1.19146 -3.29430  
H 0.30275 -2.89721 -0.84510  
H -0.73365 -3.53129 -2.09836  
H -2.17852 -2.20674 -0.84594  
H -1.84698 -1.24866 -2.27199  
H -1.96618 0.10384 -0.26366  
H -0.71972 -0.83446 0.54289  
C 1.87389 1.77921 1.20939  
H 1.06299 1.48315 1.87851  
H 2.77228 1.96308 1.79488  
H 1.59633 2.69237 0.67871

4

C -0.24034 0.13883 0.02800  
O -0.70348 0.10380 1.36913  
C 0.96945 -0.66247 -0.11872  
C 1.74038 -1.44893 -0.60421  
C 2.19989 -2.45830 -1.54839  
C 1.31665 -2.28469 -2.81705  
N -0.11765 -2.17223 -2.53449  
C -0.78963 -0.87422 -2.37527  
C -1.29123 -0.49580 -0.94512  
H -0.03613 1.17938 -0.26581

H 2.05927 -3.46163 -1.13671  
H 3.25422 -2.35650 -1.82228  
H 1.45494 -3.14712 -3.47017  
H 1.62778 -1.38239 -3.34760  
H -1.68819 -0.87712 -3.00062  
H -0.12097 -0.10998 -2.77432  
O -2.47746 0.29632 -1.02552  
H -1.61871 -1.41043 -0.44673  
C -2.39167 1.53183 -1.72248  
C -1.47635 1.22257 1.78228  
H -3.38370 1.97992 -1.66562  
H -1.67245 2.22415 -1.26863  
H -2.13346 1.40032 -2.77967  
H -1.60870 1.12029 2.85962  
H -0.94712 2.16539 1.58306  
H -2.45606 1.24555 1.29705  
C -0.85483 -3.32298 -2.51570  
H -1.93565 -3.13020 -2.38041  
O -0.40208 -4.44322 -2.64192

4-TS1

C 0.01154 -0.00702 0.00973  
O 0.01501 -0.02218 1.43151  
C 1.39414 -0.00777 -0.50438  
N 2.28986 1.67978 0.55904  
C 2.29780 -0.44652 -1.21868  
N 4.04461 0.79394 -0.58283  
C 2.82362 -1.37552 -2.22459  
C 1.65743 -1.88695 -3.09807  
N 0.54459 -2.44746 -2.33226  
C -0.63204 -1.65031 -1.97311  
C -0.76536 -1.26202 -0.47571  
H -0.48893 0.90027 -0.35360  
H 3.30907 -2.22448 -1.73416  
H 3.56846 -0.90915 -2.87647  
H 2.02911 -2.67090 -3.75996  
H 1.27043 -1.06588 -3.70582  
H -1.52739 -2.23502 -2.20699  
H -0.64430 -0.77028 -2.61882  
O -2.14227 -1.17557 -0.09795  
H -0.38268 -2.09015 0.12400  
C -2.96011 -0.26212 -0.81382  
C -0.84976 0.91174 2.05513  
H -3.94892 -0.32228 -0.35845  
H -2.60812 0.77420 -0.73800  
H -3.05438 -0.52283 -1.87509  
H -0.67863 0.81846 3.12811  
H -0.61351 1.93974 1.75156  
H -1.90333 0.69375 1.84582  
C 0.58505 -3.77844 -2.02832  
N 3.36295 1.57125 0.12687  
H -0.33389 -4.12461 -1.51964  
O 1.51004 -4.52314 -2.28688  
C 5.21810 1.30198 -1.28878  
H 5.58622 0.48481 -1.90864  
H 4.98505 2.15767 -1.93197  
H 6.01467 1.57985 -0.59175

4-TS2

C -0.00262 -0.00049 -0.00546  
O 0.00004 0.00285 1.42022  
C 1.38141 0.00066 -0.49719  
N 2.31685 1.74501 0.59353  
C 2.30743 -0.37060 -1.22147  
N 3.97688 0.89888 -0.71198  
C 2.85029 -1.26298 -2.25610  
C 1.71220 -1.77185 -3.16080  
N 0.59729 -2.37019 -2.42428  
C -0.58592 -1.59497 -2.04778  
C -0.74523 -1.26368 -0.53742

H -0.50850 0.90597 -0.36948  
H 3.34300 -2.11581 -1.77904  
H 3.60546 -0.76089 -2.86711  
H 2.10513 -2.53397 -3.83559  
H 1.31883 -0.94448 -3.75634  
H -1.47566 -2.17507 -2.31266  
H -0.59686 -0.69006 -2.65799  
O -2.13240 -1.23203 -0.18337  
H -0.34805 -2.10181 0.03863  
C -2.96275 -0.30739 -0.87285  
C -1.14885 0.55440 2.04950  
H -3.95990 -0.42206 -0.44727  
H -2.64483 0.73296 -0.73554  
H -3.02171 -0.51695 -1.94719  
H -0.89639 0.66231 3.10548  
H -1.38750 1.54771 1.64204  
H -2.02195 -0.09424 1.95126  
C 0.63629 -3.71276 -2.17477  
N 3.45049 1.53579 0.10597  
C 2.21814 2.19858 1.98211  
H 2.77181 3.13009 2.13055  
H 1.16558 2.38319 2.18015  
H 2.57831 1.44020 2.68396  
H -0.28788 -4.07851 -1.68859  
O 1.56201 -4.44817 -2.45387

5

C -0.07983 0.09578 0.04419  
O -0.14173 -0.13673 1.44884  
C 1.26672 0.60741 -0.39302  
N 1.51791 1.94938 -0.35464  
C 2.41606 -0.03772 -0.82208  
N 3.29970 0.98163 -1.01684  
C 2.73372 -1.46142 -1.16241  
C 2.17484 -1.91464 -2.53481  
N 0.76393 -2.27671 -2.53158  
C -0.25955 -1.31086 -2.14094  
C -0.49142 -1.23860 -0.60211  
H -0.79899 0.88271 -0.22499  
H 2.36780 -2.13107 -0.38156  
H 3.81870 -1.59156 -1.18921  
H 2.70315 -2.80959 -2.86294  
H 2.34742 -1.12408 -3.27506  
H -1.20054 -1.62602 -2.59563  
H 0.00011 -0.33848 -2.56764  
O -1.81527 -1.63820 -0.26343  
H 0.11939 -2.01242 -0.13436  
C -2.85827 -0.71114 -0.51086  
C -0.20024 1.03815 2.24574  
H -3.79018 -1.25668 -0.35998  
H -2.83431 0.13318 0.18720  
H -2.84746 -0.32273 -1.53907  
H -0.29562 0.70285 3.27872  
H 0.69802 1.65471 2.14054  
H -1.07359 1.65167 1.98465  
C 0.40990 -3.55784 -2.86645  
N 2.74028 2.17550 -0.72299  
H -0.68554 -3.70007 -2.84319  
O 1.17895 -4.44858 -3.16379  
C 4.68317 0.94022 -1.46267  
H 5.29189 0.34167 -0.78226  
H 4.75701 0.53323 -2.47291  
H 5.04112 1.96737 -1.45949

6

C -0.18687 0.21607 -0.00280  
O -0.63641 -0.01320 1.33545  
C 1.25807 -0.18907 -0.02375  
C 1.95975 -1.31371 -0.42670  
C 1.54361 -2.58999 -1.09462

C 1.23291 -2.47359 -2.59893  
N -0.09173 -1.94043 -2.90664  
C -0.47121 -0.60199 -2.47899  
C -1.05877 -0.53291 -1.03679  
H -0.24168 1.29517 -0.21667  
H 0.69471 -3.05266 -0.58327  
H 2.39037 -3.27136 -0.98473  
H 1.26085 -3.46201 -3.05614  
H 1.99672 -1.85242 -3.08097  
H -1.24561 -0.25259 -3.16381  
H 0.38969 0.06136 -2.60158  
O -2.40598 -0.04326 -1.04322  
H -1.17314 -1.55367 -0.67031  
C -2.63320 1.27392 -1.52275  
C -1.73131 0.77417 1.79278  
H -3.71556 1.39768 -1.56056  
H -2.22003 2.04369 -0.86031  
H -2.23520 1.43348 -2.53196  
H -1.79704 0.60347 2.86771  
H -1.55060 1.84451 1.61821  
H -2.67061 0.48345 1.31827  
C -0.97787 -2.70784 -3.61639  
N 2.21840 0.61507 0.52007  
N 3.42743 0.03475 0.45304  
N 3.27586 -1.12087 -0.12161  
C 2.07328 1.89491 1.19188  
H 3.06803 2.19579 1.51268  
H 1.66873 2.64795 0.51173  
H 1.41699 1.79045 2.05672  
H -1.92531 -2.16948 -3.80799  
O -0.78243 -3.83911 -4.00763

7a

C 0.26557 -0.03884 -0.09151  
C 1.48314 -0.75626 -0.21481  
C 2.23945 -1.54794 -0.73947  
C 2.58002 -2.58422 -1.64691  
C 1.47598 -3.09970 -2.38522  
C 0.06635 -2.62199 -2.08155  
C -0.24123 -1.09864 -2.35619  
C -0.65136 -0.25780 -1.15950  
H -0.14324 -2.83326 -1.02899  
H -0.63373 -3.22666 -2.66319  
H -1.03227 -1.03545 -3.10738  
H 0.64641 -0.64145 -2.80285  
C 3.86440 -3.08006 -1.89687  
C 4.07760 -4.05793 -2.85634  
C 3.00417 -4.56524 -3.60321  
C 1.71309 -4.06936 -3.35144  
H 0.87647 -4.47205 -3.91572  
H 4.70171 -2.68525 -1.33350  
H 5.07959 -4.43575 -3.03202  
C -0.10612 0.78894 0.97340  
C -1.35454 1.39110 1.00720  
C -2.27535 1.17374 -0.02835  
C -1.90212 0.34384 -1.09981  
H 0.59405 0.95288 1.78395  
H -1.62340 2.03574 1.83771  
H -2.60602 0.18676 -1.91244  
H -3.84925 2.11288 0.87239  
H -4.22968 1.38141 -0.58639  
H 4.13535 -5.66439 -4.90036  
H 2.49598 -5.66678 -5.24701  
N -3.50972 1.82033 -0.03187  
N 3.20023 -5.58856 -4.52841

7a-TS3

C -0.00061 0.00817 -0.03930  
N 0.01350 0.01108 2.15624  
C 1.20608 0.02122 -0.35012

N 2.23827 -0.05970 1.66669  
C -1.37688 -0.03435 -0.45400  
C 2.26073 -0.01169 -1.31776  
C 1.93881 -0.51819 -2.60536  
C 0.53134 -0.98625 -2.88860  
C -0.53211 0.17119 -2.84883  
C -1.65214 -0.00323 -1.84882  
H 0.25304 -1.74765 -2.15492  
H 0.50104 -1.46782 -3.86883  
H -0.96446 0.28991 -3.84521  
H -0.01450 1.10824 -2.62409  
N 1.15928 -0.09704 2.30557  
C 3.32283 -0.94062 2.11102  
H 3.77869 -0.57274 3.03563  
H 2.98553 -1.97175 2.25700  
H 4.07654 -0.92674 1.32562  
C -2.45772 -0.14267 0.43394  
C -3.76427 -0.22779 -0.01877  
C -4.04347 -0.21219 -1.39201  
C -2.96819 -0.10088 -2.28690  
C 3.55551 0.47861 -1.09795  
C 4.51929 0.45296 -2.09393  
C 4.21783 -0.06892 -3.36012  
C 2.91611 -0.53959 -3.59365  
H 3.78920 0.90959 -0.13283  
H 5.51358 0.83994 -1.89463  
H 2.66696 -0.93726 -4.57359  
H -3.17286 -0.06818 -3.35343  
H -4.57867 -0.30426 0.69468  
H -2.25820 -0.16390 1.49564  
N -5.35658 -0.23618 -1.85779  
H -5.47727 -0.56662 -2.80370  
H -6.03388 -0.63428 -1.22424  
N 5.19912 -0.17026 -4.34518  
H 4.85773 -0.21696 -5.29395  
H 5.97385 0.46994 -4.25092

8a

C 0.56864 -0.14290 -0.35023  
C 2.02676 -0.18910 -0.48793  
C 2.85080 -1.03735 -1.21739  
C 2.53706 -2.27888 -1.95177  
C 1.50646 -2.46665 -2.89583  
C 0.62298 -1.39693 -3.53714  
C 0.39928 -0.02584 -2.87539  
C -0.23395 -0.07984 -1.50480  
H -0.36024 -1.84929 -3.70476  
H 1.03309 -1.20591 -4.53740  
H -0.25577 0.54308 -3.54304  
H 1.34285 0.52038 -2.82675  
C 3.35477 -3.38163 -1.63894  
C 3.16556 -4.63437 -2.18913  
C 2.11534 -4.84300 -3.09392  
C 1.31528 -3.74870 -3.42795  
H 0.51467 -3.89479 -4.14845  
H 4.16230 -3.22470 -0.93478  
H 3.81514 -5.45730 -1.90848  
C -0.05611 -0.18264 0.90366  
C -1.43590 -0.16145 1.02658  
C -2.24521 -0.09928 -0.11854  
C -1.62053 -0.05756 -1.37285  
H 0.55089 -0.25844 1.79895  
H -1.89436 -0.19676 2.00937  
H -2.23619 0.01033 -2.26562  
H -4.02269 -0.37069 0.84991  
H -4.15232 -0.30746 -0.82075  
H 2.63202 -6.74623 -3.61285  
H 1.33488 -6.13152 -4.47131  
N -3.62988 -0.01463 -0.00867  
N 1.84383 -6.11545 -3.59956

N 2.89714 0.67558 0.11153  
N 4.17218 0.37526 -0.21077  
N 4.14621 -0.65365 -1.00253  
C 2.62835 1.80903 0.97996  
H 3.50709 2.45019 0.95085  
H 1.75486 2.35285 0.62009  
H 2.45208 1.48689 2.00870

7b

C 0.13620 0.18312 -0.23593  
C 1.37342 -0.51085 -0.28346  
C 2.13948 -1.35708 -0.69526  
C 2.49339 -2.50900 -1.44528  
C 1.39368 -3.15722 -2.06667  
C -0.02396 -2.68056 -1.80131  
C -0.38820 -1.22492 -2.29414  
C -0.79524 -0.22320 -1.22731  
H -0.20530 -2.73617 -0.72413  
H -0.71640 -3.38550 -2.26756  
H -1.19969 -1.30061 -3.02184  
H 0.47226 -0.81716 -2.83232  
C 3.79196 -2.99908 -1.64575  
C 4.01566 -4.10046 -2.45209  
C 2.93882 -4.73489 -3.08318  
C 1.63678 -4.25990 -2.88765  
O 3.25956 -5.80709 -3.86084  
H 0.79647 -4.75106 -3.36105  
H 4.62544 -2.50029 -1.16573  
H 5.01323 -4.48878 -2.61568  
C -0.22990 1.15881 0.70250  
C -1.49301 1.72206 0.68111  
C -2.42386 1.31424 -0.28204  
C -2.07040 0.34514 -1.22802  
H 0.48794 1.46550 1.45380  
H -2.77864 0.03246 -1.98438  
O -3.64182 1.92255 -0.21989  
H -1.78832 2.47652 1.39963  
C -4.63623 1.55763 -1.16568  
C 2.21747 -6.49948 -4.53255  
H 2.70278 -7.30267 -5.08464  
H 1.49914 -6.93027 -3.82581  
H 1.68808 -5.84655 -5.23578  
H -5.51005 2.16097 -0.92515  
H -4.31720 1.77740 -2.19086  
H -4.89740 0.49621 -1.08633

7b-TS3

C -0.00189 0.01283 -0.03881  
N 0.01009 0.01030 2.15257  
C 1.20498 0.02550 -0.34733  
N 2.23396 -0.06843 1.66287  
C -1.37878 -0.03700 -0.45472  
C 2.25999 0.00948 -1.31685  
C 1.93844 -0.48757 -2.61176  
C 0.53499 -0.96370 -2.90004  
C -0.53464 0.18675 -2.85281  
C -1.65229 -0.00119 -1.85303  
H 0.26084 -1.73406 -2.17421  
H 0.51075 -1.43591 -3.88433  
H -0.97048 0.30648 -3.84690  
H -0.02351 1.12665 -2.62523  
N 1.15529 -0.10303 2.30245  
C 3.31208 -0.96176 2.09819  
C -2.45327 -0.15570 0.43289  
C -3.76796 -0.25101 -0.01425  
C -4.02885 -0.23260 -1.38490  
C -2.96536 -0.10795 -2.28774  
C 3.54734 0.50343 -1.08833  
C 4.52097 0.49903 -2.08407  
C 4.20758 -0.01037 -3.34568

C 2.91542 -0.49060 -3.59613  
H 3.77701 0.92325 -0.11766  
H 5.50307 0.89652 -1.86716  
H 2.69685 -0.86726 -4.58892  
H -3.19939 -0.08234 -3.34597  
H -4.56709 -0.34098 0.70890  
H -2.25227 -0.17727 1.49406  
O -5.26873 -0.32139 -1.94358  
O 5.07505 -0.07732 -4.39481  
C 6.40085 0.39631 -4.20746  
C -6.39234 -0.43255 -1.08155  
H -7.26296 -0.48504 -1.73329  
H -6.34254 -1.34102 -0.47087  
H -6.48362 0.44053 -0.42572  
H 4.06336 -0.94959 1.31063  
H 2.96547 -1.99011 2.23926  
H 3.77401 -0.60289 3.02291  
H 6.90851 0.24333 -5.15834  
H 6.41548 1.46319 -3.95778  
H 6.92192 -0.16656 -3.42474

8b

C 0.25875 -0.01605 -0.22974  
C 1.57225 -0.43575 0.29942  
C 2.53497 -1.28269 -0.23438  
C 2.50123 -2.16797 -1.40225  
C 1.47076 -3.11248 -1.51904  
C 0.42036 -3.24207 -0.44066  
C -0.83329 -2.37665 -0.65784  
C -0.75770 -0.85162 -0.72502  
H 0.85857 -3.02252 0.53439  
H 0.08219 -4.28259 -0.40238  
H -1.53636 -2.62221 0.14881  
H -1.31606 -2.71657 -1.58052  
C 3.46471 -2.08008 -2.42087  
C 3.41537 -2.90450 -3.52935  
C 2.38669 -3.84809 -3.64745  
C 1.42315 -3.94643 -2.64260  
O 2.41819 -4.61799 -4.76921  
H 0.62928 -4.67930 -2.71141  
H 4.24987 -1.33603 -2.34970  
H 4.15133 -2.83555 -4.32067  
C 0.03877 1.37845 -0.23626  
C -1.11317 1.94763 -0.73408  
C -2.10843 1.11978 -1.26441  
C -1.92135 -0.25776 -1.25050  
H 0.81604 2.01231 0.17089  
H -2.69494 -0.91148 -1.63325  
O -3.21058 1.75208 -1.75973  
H -1.26242 3.02019 -0.73601  
C -4.25720 0.96518 -2.30700  
C 1.40038 -5.59183 -4.95709  
H 1.62285 -6.07291 -5.90792  
H 1.41181 -6.34388 -4.16033  
H 0.40803 -5.13031 -5.00842  
H -5.01739 1.67063 -2.63892  
H -3.91237 0.37579 -3.16443  
H -4.69130 0.29359 -1.55730  
N 2.10938 0.17027 1.40173  
N 3.32000 -0.25817 1.58981  
N 3.59897 -1.14121 0.60898  
C 4.89861 -1.79127 0.58328  
H 5.56788 -1.30885 -0.13237  
H 5.31928 -1.70384 1.58297  
H 4.78346 -2.84163 0.31573

7c

C 0.23263 0.32308 -0.42996  
C 1.50473 -0.30590 -0.41769  
C 2.30695 -1.16077 -0.73064

C 2.70725 -2.38670 -1.32346  
C 1.63200 -3.17148 -1.81714  
C 0.19613 -2.73529 -1.58010  
C -0.25801 -1.38281 -2.25821  
C -0.69671 -0.26444 -1.32820  
H 0.04108 -2.64947 -0.50080  
H -0.46640 -3.53287 -1.92464  
H -1.07955 -1.60061 -2.94482  
H 0.56708 -1.01020 -2.87195  
C 4.02631 -2.83246 -1.49021  
C 4.29299 -4.02359 -2.14046  
C 3.24008 -4.79607 -2.64601  
C 1.91811 -4.36517 -2.48244  
O 3.60401 -5.94945 -3.27319  
H 1.09668 -4.96092 -2.85836  
H 4.84066 -2.22863 -1.10818  
H 5.30670 -4.37914 -2.27675  
C -0.16567 1.39863 0.37668  
C -1.45820 1.88691 0.31590  
C -2.38690 1.30258 -0.55414  
C -2.00116 0.23157 -1.36894  
H 0.55084 1.84277 1.05711  
H -1.77929 2.71655 0.93332  
H -2.70787 -0.21865 -2.05375  
O -3.63434 1.84986 -0.53859  
C 2.59380 -6.80232 -3.81408  
C -4.64375 1.31652 -1.39701  
C -5.91161 2.11339 -1.15678  
H -4.32337 1.39844 -2.44326  
H -4.80106 0.25434 -1.17100  
C 3.29336 -7.99089 -4.44517  
H 1.91511 -7.12756 -3.01561  
H 2.00448 -6.25440 -4.56008  
H -6.71645 1.74154 -1.79590  
H -6.22690 2.02730 -0.11485  
H -5.74918 3.16959 -1.38144  
H 2.55792 -8.67670 -4.87329  
H 3.96629 -7.66209 -5.23983  
H 3.87953 -8.53139 -3.69909

7c-TS3

C -0.00370 0.01853 -0.04216  
N 0.00926 0.00731 2.15404  
C 1.20331 0.03532 -0.34961  
N 2.23280 -0.06345 1.65863  
C -1.38026 -0.03280 -0.45887  
C 2.25900 0.01847 -1.31824  
C 1.94049 -0.48856 -2.60984  
C 0.53885 -0.97139 -2.89607  
C -0.53433 0.17615 -2.85778  
C -1.65263 -0.00698 -1.85766  
H 0.26628 -1.73733 -2.16492  
H 0.51690 -1.45050 -3.87714  
H -0.96943 0.28785 -3.85321  
H -0.02591 1.11909 -2.63624  
N 1.15489 -0.10451 2.29930  
C 3.30838 -0.96721 2.07928  
C -2.45600 -0.14315 0.42848  
C -3.77034 -0.23997 -0.01889  
C -4.03078 -0.23233 -1.39024  
C -2.96554 -0.11592 -2.29251  
C 3.54403 0.51980 -1.09256  
C 4.51820 0.51321 -2.08761  
C 4.20864 -0.00700 -3.34631  
C 2.91835 -0.49466 -3.59335  
H 3.77183 0.94600 -0.12416  
H 5.49792 0.91735 -1.87316  
H 2.70172 -0.87933 -4.58355  
H -3.19814 -0.09787 -3.35127  
H -4.57002 -0.32283 0.70422

H -2.25592 -0.15697 1.49003  
O -5.26959 -0.32538 -1.94931  
O 5.07678 -0.07871 -4.39380  
C 6.41158 0.40146 -4.22268  
C -6.41062 -0.42404 -1.09420  
C -7.63804 -0.50316 -1.98141  
H -6.32591 -1.31768 -0.46341  
H -6.45865 0.45318 -0.43705  
H 4.05849 -0.94559 1.29092  
H 2.95836 -1.99653 2.20515  
H 3.77273 -0.62387 3.00881  
C 7.14327 0.18616 -5.53335  
H 6.39204 1.46525 -3.95536  
H 6.90097 -0.14568 -3.40734  
H -8.54067 -0.57892 -1.36943  
H -7.71689 0.38809 -2.60756  
H -7.58509 -1.37829 -2.63255  
H 8.17459 0.53863 -5.45146  
H 7.15826 -0.87403 -5.79421  
H 6.65230 0.73295 -6.34080

8c

C 0.54729 0.32110 -0.35985  
C 2.01301 0.29568 -0.36485  
C 2.91211 -0.63406 -0.87160  
C 2.69617 -1.98785 -1.42117  
C 1.76315 -2.36312 -2.40362  
C 0.89185 -1.45196 -3.26794  
C 0.59850 0.00526 -2.87169  
C -0.14860 0.16702 -1.56831  
H -0.06956 -1.95877 -3.40534  
H 1.35444 -1.42575 -4.26306  
H -0.00511 0.43494 -3.67759  
H 1.52804 0.57634 -2.84234  
C 3.52390 -2.99018 -0.87036  
C 3.43251 -4.31537 -1.23682  
C 2.47832 -4.69690 -2.18647  
C 1.66455 -3.72318 -2.75500  
O 2.43006 -6.02616 -2.48484  
H 0.93962 -3.99980 -3.51003  
H 4.25693 -2.68823 -0.13324  
H 4.07322 -5.07121 -0.79973  
C -0.18167 0.47846 0.83068  
C -1.56380 0.48562 0.83131  
C -2.26095 0.33191 -0.37422  
C -1.54879 0.17358 -1.56456  
H 0.34785 0.57192 1.77195  
H -2.12916 0.60031 1.74770  
H -2.07038 0.06637 -2.50699  
O -3.61762 0.35450 -0.27815  
C 1.48974 -6.48945 -3.45378  
C -4.40649 0.20009 -1.46103  
C -5.86350 0.26075 -1.04538  
H -4.16874 1.00070 -2.17232  
H -4.17485 -0.76051 -1.93728  
C 1.66403 -7.99141 -3.57430  
H 0.47066 -6.23889 -3.13302  
H 1.67412 -5.99678 -4.41683  
H -6.50918 0.14442 -1.91960  
H -6.09331 -0.53620 -0.33529  
H -6.08826 1.21907 -0.57281  
H 0.96147 -8.39525 -4.30801  
H 2.67909 -8.23503 -3.89464  
H 1.48047 -8.47677 -2.61350  
N 2.81204 1.27292 0.15614  
N 4.11516 0.96418 -0.00510  
N 4.17670 -0.18035 -0.61332  
C 2.45125 2.52943 0.79157  
H 3.33631 3.16189 0.76842  
H 1.63705 3.00435 0.24376

H 2.14542 2.37561 1.82849

7d

C 0.26020 -0.06319 -0.06340  
C 1.48514 -0.76432 -0.19986  
C 2.25035 -1.53611 -0.74186  
C 2.59673 -2.55643 -1.66413  
C 1.49922 -3.07301 -2.40829  
C 0.08410 -2.61999 -2.08940  
C -0.24757 -1.09738 -2.33731  
C -0.66228 -0.28062 -1.12476  
H -0.11690 -2.85080 -1.03923  
H -0.61084 -3.22502 -2.67700  
H -1.04429 -1.03442 -3.08266  
H 0.63053 -0.62072 -2.78260  
C 3.88220 -3.03365 -1.93620  
C 4.10532 -3.98877 -2.91543  
C 3.03536 -4.51103 -3.67340  
C 1.73823 -4.01897 -3.39711  
H 0.89057 -4.39142 -3.95662  
H 4.72155 -2.63861 -1.37569  
H 5.11818 -4.32059 -3.09379  
C -0.12476 0.74174 1.01238  
C -1.38228 1.32187 1.06611  
C -2.31877 1.11539 0.03049  
C -1.92469 0.29420 -1.05172  
H 0.57288 0.90514 1.82552  
H -1.63558 1.93029 1.92251  
H -2.61318 0.10854 -1.86524  
C -4.01194 2.38529 1.27136  
C -4.58688 1.29825 -0.89275  
C 4.60211 -5.82318 -5.03070  
C 2.16830 -5.83166 -5.55321  
N -3.57280 1.70810 0.06329  
N 3.24436 -5.48204 -4.64203  
H -4.99682 2.81758 1.09852  
H -4.07841 1.71250 2.13939  
H -3.33526 3.20500 1.53042  
H -5.48712 1.89005 -0.73109  
H -4.25729 1.47965 -1.92003  
H -4.85314 0.23448 -0.80385  
H 4.57010 -6.62373 -5.76882  
H 5.14878 -4.97386 -5.46701  
H 5.17571 -6.18996 -4.17431  
H 2.50947 -6.62426 -6.21816  
H 1.29894 -6.21333 -5.00966  
H 1.83783 -4.98270 -6.17001

7d-TS3

C -0.00332 0.01804 -0.04391  
N 0.00974 0.02159 2.15504  
C 1.20318 0.03260 -0.35443  
N 2.23575 -0.04014 1.66746  
C -1.37801 -0.03151 -0.45904  
C 2.25699 0.00267 -1.32145  
C 1.93913 -0.49768 -2.61080  
C 0.53265 -0.96999 -2.89597  
C -0.53729 0.18113 -2.85203  
C -1.65643 -0.00290 -1.85167  
H 0.25757 -1.73545 -2.16518  
H 0.50408 -1.44830 -3.87803  
H -0.97020 0.30041 -3.84820  
H -0.02439 1.12019 -2.62497  
N 1.15585 -0.08241 2.30467  
C 3.32035 -0.92105 2.11021  
H 3.76830 -0.56214 3.04248  
H 2.98564 -1.95494 2.24216  
H 4.07973 -0.89592 1.33056  
C -2.46084 -0.15465 0.42232  
C -3.76666 -0.25465 -0.02805

C -4.06119 -0.23231 -1.40705  
C -2.96935 -0.11601 -2.29522  
C 3.54990 0.49731 -1.10880  
C 4.51409 0.48062 -2.10398  
C 4.22725 -0.04934 -3.37996  
C 2.91157 -0.51269 -3.60386  
H 3.78637 0.93168 -0.14560  
H 5.49007 0.89052 -1.88481  
H 2.63205 -0.89669 -4.57586  
H -3.14301 -0.09614 -3.36291  
H -4.55715 -0.35509 0.70237  
H -2.26592 -0.17990 1.48503  
N -5.36651 -0.30288 -1.87220  
C -5.61386 -0.51457 -3.28793  
C -6.44034 -0.61158 -0.94308  
N 5.19695 -0.11859 -4.37069  
C 4.80887 -0.44685 -5.73159  
C 6.46605 0.56210 -4.17606  
H -6.48105 0.12284 -0.13345  
H -7.39187 -0.56651 -1.47207  
H -6.34347 -1.61043 -0.49108  
H -5.18140 0.29104 -3.88892  
H -5.20703 -1.46870 -3.65572  
H -6.68896 -0.51098 -3.46489  
H 4.32208 -1.42553 -5.77592  
H 4.12498 0.29369 -6.17356  
H 5.70275 -0.49949 -6.35241  
H 6.97294 0.19635 -3.27815  
H 7.11577 0.35186 -5.02506  
H 6.35916 1.65391 -4.08534

8d

C 0.63017 0.05565 -0.12695  
C 2.09048 -0.01531 -0.21368  
C 2.92557 -0.82764 -0.97204  
C 2.62128 -2.00253 -1.81172  
C 1.62369 -2.10998 -2.80019  
C 0.76813 -0.98689 -3.38694  
C 0.55102 0.34084 -2.64172  
C -0.13094 0.20968 -1.29926  
H -0.21845 -1.41097 -3.60227  
H 1.20162 -0.73831 -4.36443  
H -0.06870 0.96818 -3.29065  
H 1.50355 0.86096 -2.52566  
C 3.42137 -3.13472 -1.57201  
C 3.24634 -4.33819 -2.22600  
C 2.21232 -4.48333 -3.17382  
C 1.43981 -3.34178 -3.44218  
H 0.67028 -3.39057 -4.20126  
H 4.21242 -3.04392 -0.83780  
H 3.90447 -5.16176 -1.98687  
C -0.04664 -0.05763 1.09385  
C -1.42879 -0.02029 1.17152  
C -2.20978 0.14169 0.00551  
C -1.52101 0.24845 -1.22118  
H 0.52128 -0.20780 2.00547  
H -1.89829 -0.12820 2.13886  
H -2.07597 0.37573 -2.14134  
C -4.27091 -0.06693 1.32099  
C -4.36885 0.19554 -1.16100  
C 2.95437 -6.75986 -3.70491  
C 1.04492 -5.74606 -4.92455  
N -3.59083 0.20432 0.06595  
N 1.96642 -5.69829 -3.80353  
H -5.34249 0.06923 1.18158  
H -4.09939 -1.09010 1.68516  
H -3.95049 0.62872 2.10312  
H -5.42656 0.26941 -0.91207  
H -4.11987 1.05229 -1.79559  
H -4.21846 -0.71949 -1.75171

H 2.57688 -7.64408 -4.21819  
H 3.92350 -6.48889 -4.15052  
H 3.12783 -7.03810 -2.66188  
H 0.93504 -6.78035 -5.25007  
H 0.05390 -5.38897 -4.63039  
H 1.38009 -5.14728 -5.78570  
N 2.95431 0.77920 0.48472  
N 4.23509 0.47237 0.19154  
N 4.21947 -0.49331 -0.67611  
C 2.67469 1.85506 1.41959  
H 3.56590 2.47772 1.46758  
H 1.82588 2.44082 1.06674  
H 2.45321 1.46679 2.41634

#### 7e

C -0.03286 0.03209 -0.01324  
C 1.19464 -0.66729 -0.16010  
C 1.95700 -1.44076 -0.69950  
C 2.31268 -2.45770 -1.62602  
C 1.20952 -2.97402 -2.36430  
C -0.20598 -2.52488 -2.04904  
C -0.54054 -1.00130 -2.29340  
C -0.95016 -0.18680 -1.07970  
H -0.41601 -2.76241 -1.00200  
H -0.89411 -3.12889 -2.64476  
H -1.34408 -0.93932 -3.03077  
H 0.33199 -0.52383 -2.74879  
C 3.61094 -2.91939 -1.87166  
C 3.83645 -3.88137 -2.84993  
C 2.76797 -4.38083 -3.59117  
C 1.47136 -3.92617 -3.34789  
H 2.94120 -5.12763 -4.35776  
H 0.64583 -4.33030 -3.92478  
H 4.43415 -2.51307 -1.29601  
H 4.84328 -4.23716 -3.03606  
C -0.38662 0.83835 1.07418  
C -1.64583 1.42524 1.12814  
C -2.55838 1.20494 0.09879  
C -2.20834 0.40563 -0.99014  
H 0.32870 0.99182 1.87311  
H -1.91589 2.04961 1.97209  
H -2.92408 0.24999 -1.79091  
H -3.54251 1.65823 0.13922

#### 7e-TS3

C -0.00222 0.00984 0.00504  
N -0.00054 0.00859 2.19897  
C 1.20747 0.00424 -0.29174  
N 2.22179 -0.09247 1.70825  
C -1.37788 -0.03936 -0.42304  
C 2.27089 -0.01958 -1.25451  
C 1.96018 -0.54459 -2.53650  
C 0.56006 -1.02462 -2.82931  
C -0.50694 0.13088 -2.81492  
C -1.63314 -0.03005 -1.82149  
H 0.27320 -1.78150 -2.09416  
H 0.54525 -1.51422 -3.80549  
H -0.93506 0.22963 -3.81489  
H 0.00751 1.07366 -2.60747  
N 1.14324 -0.11658 2.34755  
C 3.28639 -1.00822 2.13083  
H 3.75717 -0.66397 3.05613  
H 2.92115 -2.03060 2.26519  
H 4.03452 -1.00173 1.34024  
C -2.45610 -0.13064 0.47004  
C -3.76194 -0.22537 0.00485  
C -4.01382 -0.23510 -1.36379  
C -2.95257 -0.13843 -2.26088  
C 3.55383 0.49174 -1.01066  
C 4.52811 0.46930 -2.00144

C 4.23443 -0.06760 -3.25261  
C 2.95719 -0.56112 -3.51133  
H 3.76242 0.92839 -0.04269  
H 5.51293 0.87439 -1.79843  
H 4.99226 -0.09429 -4.02727  
H 2.72635 -0.96555 -4.49159  
H -3.15169 -0.13462 -3.32762  
H -4.58060 -0.29435 0.71207  
H -5.03011 -0.31144 -1.73358  
H -2.25482 -0.13069 1.53112

#### 8e

C 0.06490 -0.45846 0.08367  
N 0.02496 -0.81723 1.40208  
C 1.39228 -0.24280 -0.26079  
N 2.07705 -0.51062 0.88807  
C -1.17700 -0.18462 -0.67041  
C 2.00377 0.16398 -1.53211  
C 1.72782 -0.58561 -2.69035  
C 0.84798 -1.81143 -2.62389  
C -0.64901 -1.54797 -2.86808  
C -1.45221 -0.58614 -1.99425  
H 0.98363 -2.31663 -1.66628  
H 1.17242 -2.51702 -3.39532  
H -1.15689 -2.52037 -2.82091  
H -0.76261 -1.20928 -3.90296  
N 1.23110 -0.85866 1.87958  
C 3.50823 -0.49203 1.14493  
H 3.86644 0.52584 1.30972  
H 3.67794 -1.08225 2.04278  
H 4.04346 -0.92995 0.30274  
C -2.13999 0.56606 0.03012  
C -3.33801 0.94999 -0.55004  
C -3.59724 0.59221 -1.87065  
C -2.66394 -0.16345 -2.56520  
C 2.83551 1.28894 -1.61061  
C 3.39213 1.67703 -2.82335  
C 3.11931 0.94011 -3.97381  
C 2.29572 -0.17904 -3.90076  
H 3.02476 1.87527 -0.71860  
H 4.02910 2.55230 -2.87166  
H 3.54978 1.23450 -4.92431  
H 2.09641 -0.75708 -4.79753  
H -2.88162 -0.45940 -3.58694  
H -4.05565 1.53152 0.01750  
H -4.51916 0.89392 -2.35453  
H -1.91696 0.84288 1.05271

#### 7f

C -0.01531 0.04267 -0.01572  
C 1.21238 -0.65612 -0.16164  
C 1.97601 -1.42678 -0.70338  
C 2.32908 -2.44465 -1.62845  
C 1.22464 -2.96090 -2.36594  
C -0.19026 -2.51087 -2.05089  
C -0.52081 -0.98764 -2.29840  
C -0.93244 -0.17534 -1.08424  
H -0.39603 -2.74634 -1.00271  
H -0.88084 -3.11448 -2.64342  
H -1.32028 -0.92411 -3.03945  
H 0.35453 -0.50909 -2.74680  
C 3.62501 -2.91030 -1.87749  
C 3.85557 -3.87378 -2.85243  
C 2.77293 -4.35266 -3.57232  
C 1.47422 -3.91520 -3.34900  
F 2.98357 -5.28654 -4.52576  
H 0.66920 -4.33928 -3.93742  
H 4.45215 -2.50790 -1.30595  
H 4.84876 -4.24963 -3.06163  
C -0.37546 0.84527 1.07267

C -1.63409 1.43198 1.13317  
C -2.52006 1.19606 0.09404  
C -2.19379 0.40908 -1.00247  
H 0.33548 1.00188 1.87443  
H -1.93488 2.05624 1.96468  
H -2.92801 0.27345 -1.78775  
F -3.74856 1.75649 0.14255

7f-TS3

C -0.00187 0.01013 0.00623  
N -0.00155 0.00972 2.19371  
C 1.20717 0.00396 -0.29343  
N 2.22144 -0.10023 1.70805  
C -1.37764 -0.02825 -0.41925  
C 2.26681 -0.02438 -1.25943  
C 1.94767 -0.53362 -2.54655  
C 0.54360 -1.00033 -2.84027  
C -0.51205 0.16474 -2.81058  
C -1.63679 -0.00359 -1.81735  
H 0.25608 -1.76086 -2.10953  
H 0.52019 -1.48087 -3.82030  
H -0.93858 0.28151 -3.80881  
H 0.00816 1.10027 -2.58681  
N 1.14131 -0.11872 2.34487  
C 3.28375 -1.01569 2.14058  
H 3.74861 -0.66757 3.06750  
H 2.91787 -2.03786 2.27574  
H 4.03757 -1.01231 1.35560  
C -2.45581 -0.12695 0.47342  
C -3.76527 -0.21498 0.01796  
C -3.98877 -0.20861 -1.34827  
C -2.95306 -0.10498 -2.26390  
C 3.55539 0.47324 -1.01790  
C 4.53073 0.45778 -2.00768  
C 4.20102 -0.06484 -3.24770  
C 2.93322 -0.54991 -3.53143  
H 3.77481 0.89926 -0.04800  
H 5.52624 0.84635 -1.83456  
F 5.14081 -0.09572 -4.21873  
H 2.72590 -0.93404 -4.52319  
H -3.18654 -0.09062 -3.32185  
H -4.60157 -0.29129 0.70107  
F -5.25610 -0.29828 -1.80985  
H -2.25591 -0.13786 1.53453

8f

C 0.07443 -0.46534 0.10284  
N 0.03254 -0.82549 1.42081  
C 1.40216 -0.25018 -0.23965  
N 2.08525 -0.52028 0.91022  
C -1.16632 -0.19257 -0.65194  
C 2.01316 0.15504 -1.51067  
C 1.73558 -0.59472 -2.66966  
C 0.85458 -1.81937 -2.60294  
C -0.63923 -1.54943 -2.85512  
C -1.44182 -0.59132 -1.97701  
H 0.98547 -2.31900 -1.64185  
H 1.18000 -2.52867 -3.36989  
H -1.15142 -2.51918 -2.81548  
H -0.74676 -1.20362 -3.88819  
N 1.23766 -0.86628 1.90042  
C 3.51635 -0.50303 1.16905  
H 3.87382 0.51414 1.34179  
H 3.68541 -1.09962 2.06302  
H 4.05251 -0.93538 0.32427  
C -2.13235 0.55487 0.04843  
C -3.33309 0.94214 -0.52321  
C -3.56360 0.57425 -1.83843  
C -2.65139 -0.17413 -2.55378  
C 2.84192 1.28207 -1.59462

C 3.39743 1.67748 -2.80498  
C 3.10706 0.92582 -3.93309  
C 2.29385 -0.19387 -3.88537  
H 3.03465 1.87175 -0.70615  
H 4.03264 2.55001 -2.88650  
F 3.63814 1.29381 -5.11824  
H 2.11189 -0.75087 -4.79709  
H -2.89937 -0.45340 -3.57129  
H -4.06822 1.52136 0.02046  
F -4.71445 0.95067 -2.44014  
H -1.91386 0.83034 1.07202

7g

C 0.03804 0.05752 0.02272  
C 1.26406 -0.64289 -0.12187  
C 2.02972 -1.40841 -0.66791  
C 2.38346 -2.42363 -1.59400  
C 1.28116 -2.93868 -2.33341  
C -0.13580 -2.49256 -2.02002  
C -0.46979 -0.96919 -2.26227  
C -0.87854 -0.15870 -1.04533  
H -0.34426 -2.73377 -0.97362  
H -0.82344 -3.09514 -2.61692  
H -1.27205 -0.90556 -3.00019  
H 0.40257 -0.48780 -2.71364  
C 3.67883 -2.88981 -1.84106  
C 3.91027 -3.85003 -2.81789  
C 2.83249 -4.33557 -3.54925  
C 1.53303 -3.89109 -3.31776  
Cl 3.11159 -5.54563 -4.79428  
H 0.71727 -4.30214 -3.89969  
H 4.50637 -2.48993 -1.26825  
H 4.91003 -4.21401 -3.01359  
C -0.32051 0.86314 1.10856  
C -1.57746 1.45223 1.16728  
C -2.47425 1.22291 0.13020  
C -2.13813 0.42986 -0.96453  
H 0.38867 1.01921 1.91215  
H -1.86062 2.07550 2.00508  
H -2.85936 0.28467 -1.75938  
Cl -4.07090 1.95707 0.19422

7g-TS3

C 0.00102 0.00239 -0.00101  
N 0.00157 0.00786 2.18510  
C 1.21017 0.00058 -0.29999  
N 2.22464 -0.09376 1.69848  
C -1.37320 -0.04335 -0.42760  
C 2.26832 -0.02634 -1.26604  
C 1.95390 -0.54724 -2.54855  
C 0.55376 -1.02711 -2.84125  
C -0.51120 0.12961 -2.82336  
C -1.63273 -0.03247 -1.82484  
H 0.27088 -1.78498 -2.10591  
H 0.53616 -1.51534 -3.81757  
H -0.94131 0.22994 -3.82183  
H 0.00203 1.07256 -2.61446  
N 1.14508 -0.11594 2.33469  
C 3.29038 -1.00726 2.12735  
H 3.75620 -0.65811 3.05329  
H 2.92680 -2.03011 2.26273  
H 4.04217 -1.00131 1.34045  
C -2.45117 -0.13432 0.46487  
C -3.75982 -0.22820 0.01021  
C -3.99522 -0.23570 -1.35832  
C -2.94939 -0.13940 -2.26947  
C 3.55299 0.48154 -1.02854  
C 4.52829 0.46325 -2.01715  
C 4.21301 -0.07276 -3.26003  
C 2.94122 -0.56637 -3.53160



H 3.77110 0.91709 -0.06246  
H 5.51631 0.86269 -1.82971  
Cl 5.44021 -0.11852 -4.51961  
H 2.72001 -0.96454 -4.51427  
H -3.16446 -0.13508 -3.33092  
H -4.58440 -0.29782 0.70739  
Cl -5.64563 -0.36030 -1.95509  
H -2.25340 -0.13550 1.52656

#### 8g

C 0.09952 -0.49859 0.17326  
N 0.05864 -0.85307 1.49267  
C 1.42692 -0.28207 -0.17024  
N 2.11092 -0.54564 0.98031  
C -1.14258 -0.22766 -0.57915  
C 2.03727 0.12368 -1.44091  
C 1.75988 -0.62331 -2.60030  
C 0.87632 -1.84670 -2.53825  
C -0.61699 -1.57351 -2.78937  
C -1.41853 -0.61970 -1.90514  
H 1.00697 -2.35055 -1.57925  
H 1.20027 -2.55373 -3.30783  
H -1.13016 -2.54290 -2.75529  
H -0.72376 -1.22197 -3.82053  
N 1.26391 -0.89127 1.97108  
C 3.54240 -0.52519 1.23962  
H 3.89727 0.49308 1.41061  
H 3.71190 -1.11968 2.13485  
H 4.07976 -0.95839 0.39613  
C -2.11086 0.51171 0.12518  
C -3.31164 0.89934 -0.44443  
C -3.55159 0.54443 -1.76586  
C -2.62921 -0.20062 -2.47922  
C 2.86872 1.24792 -1.52393  
C 3.42631 1.64220 -2.73321  
C 3.14303 0.89592 -3.87169  
C 2.32284 -0.22340 -3.81438  
H 3.06291 1.83830 -0.63615  
H 4.06153 2.51575 -2.79548  
Cl 3.84053 1.37486 -5.41240  
H 2.13085 -0.79208 -4.71622  
H -2.85886 -0.48292 -3.49962  
H -4.03795 1.47284 0.11598  
Cl -5.05047 1.04226 -2.54343  
H -1.89487 0.78271 1.15060

#### 7h

C 0.28750 -0.10592 -0.33337  
C 1.51152 -0.80516 -0.48108  
C 2.27062 -1.58645 -1.01323  
C 2.62691 -2.60067 -1.93702  
C 1.52213 -3.11426 -2.67803  
C 0.10512 -2.66680 -2.36892  
C -0.22789 -1.14392 -2.61544  
C -0.63135 -0.32773 -1.40107  
H -0.10875 -2.90884 -1.32378  
H -0.57864 -3.26977 -2.96890  
H -1.03485 -1.08262 -3.34768  
H 0.64094 -0.66418 -3.07544  
C 3.92831 -3.06268 -2.17239  
C 4.16418 -4.02172 -3.14567  
C 3.08369 -4.50407 -3.87472  
C 1.77957 -4.06798 -3.65613  
H 0.98115 -4.49204 -4.25017  
H 4.74893 -2.65923 -1.59303  
H 5.15701 -4.39479 -3.35249  
C -0.05732 0.70451 0.75599  
C -1.31027 1.29518 0.81882  
C -2.20533 1.05986 -0.21809  
C -1.88613 0.26454 -1.31545

H 0.66025 0.85986 1.55147  
H -1.60618 1.92245 1.64747  
H -2.62419 0.13037 -2.09483  
O -3.80958 2.36386 0.82202  
O -4.30745 1.47645 -1.09442  
O 4.48085 -5.87837 -5.10549  
O 2.35404 -5.94872 -5.53010  
N -3.54544 1.68253 -0.15905  
N 3.32508 -5.52398 -4.91800

#### 7h-TS3

C -0.00219 0.02069 -0.02888  
N 0.00706 0.00857 2.15001  
C 1.20782 0.03120 -0.32968  
N 2.22682 -0.06086 1.64791  
C -1.37548 -0.04587 -0.45409  
C 2.26021 0.02292 -1.30056  
C 1.95446 -0.52771 -2.57512  
C 0.56502 -1.04094 -2.85867  
C -0.51979 0.09686 -2.85836  
C -1.63539 -0.06291 -1.85362  
H 0.29689 -1.79473 -2.11364  
H 0.55861 -1.54217 -3.82797  
H -0.95717 0.16877 -3.85560  
H -0.02363 1.05380 -2.67231  
N 1.15292 -0.10195 2.29081  
C 3.30944 -0.96588 2.05620  
H 3.76959 -0.62464 2.98732  
H 2.96139 -1.99598 2.17347  
H 4.05982 -0.93212 1.26894  
C -2.44751 -0.12777 0.45011  
C -3.75467 -0.24266 0.00313  
C -3.98594 -0.27973 -1.36559  
C -2.95057 -0.19168 -2.28883  
C 3.53136 0.57112 -1.06413  
C 4.50573 0.56209 -2.04975  
C 4.19864 -0.00792 -3.27968  
C 2.94310 -0.54008 -3.55325  
H 3.73253 1.02497 -0.10322  
H 5.48690 0.98483 -1.88683  
H 2.75313 -0.95634 -4.53346  
H -3.18843 -0.21331 -3.34374  
H -4.58689 -0.30724 0.68951  
H -2.24161 -0.10613 1.50954  
N 5.23298 -0.03938 -4.33407  
N -5.37322 -0.41039 -1.85932  
O 6.32185 0.45555 -4.07384  
O 4.93864 -0.55933 -5.40255  
O -5.54380 -0.44233 -3.07142  
O -6.26651 -0.48041 -1.02583

#### 8h

C 0.67739 0.06121 -0.47900  
C 2.13612 0.04641 -0.63042  
C 2.96681 -0.78886 -1.36630  
C 2.67270 -2.03177 -2.10737  
C 1.64057 -2.21169 -3.05470  
C 0.74318 -1.14842 -3.68548  
C 0.49780 0.21015 -3.00725  
C -0.12552 0.12264 -1.63461  
H -0.23010 -1.61588 -3.86335  
H 1.15426 -0.93973 -4.68092  
H -0.17514 0.77079 -3.66205  
H 1.42812 0.77830 -2.95875  
C 3.51875 -3.11475 -1.79455  
C 3.35287 -4.36752 -2.35495  
C 2.30318 -4.53903 -3.24819  
C 1.46908 -3.49172 -3.59695  
H 0.68593 -3.67941 -4.31969  
H 4.31958 -2.94360 -1.08749

H 3.99779 -5.19834 -2.10752  
C 0.08211 -0.00487 0.78934  
C -1.29748 -0.01405 0.92967  
C -2.07395 0.04467 -0.22114  
C -1.51244 0.11287 -1.48836  
H 0.70644 -0.07718 1.67143  
H -1.77540 -0.07233 1.89709  
H -2.16685 0.16963 -2.34818  
O -4.01573 -0.00577 1.03798  
O -4.20766 0.08559 -1.12173  
O 2.83072 -6.77386 -3.52664  
O 1.14491 -5.98433 -4.64107  
N -3.54976 0.04084 -0.09165  
N 2.07436 -5.86910 -3.85272  
N 2.99634 0.91177 -0.02156  
N 4.27160 0.62880 -0.35498  
N 4.25753 -0.39775 -1.14588  
C 2.72338 2.04327 0.85386  
H 3.61566 2.66538 0.85306  
H 1.87293 2.61098 0.47686  
H 2.51644 1.71043 1.87244

7i

C 0.37591 0.14216 0.12158  
C 1.59514 -0.56977 -0.00578  
C 2.34873 -1.37133 -0.51549  
C 2.69827 -2.41110 -1.41340  
C 1.59286 -2.93333 -2.14570  
C 0.17877 -2.46707 -1.84929  
C -0.14270 -0.94806 -2.13310  
C -0.54382 -0.09942 -0.93986  
H -0.03707 -2.68125 -0.79857  
H -0.51042 -3.07924 -2.43395  
H -0.94608 -0.89884 -2.87047  
H 0.73137 -0.48590 -2.60096  
C 3.99437 -2.89197 -1.63553  
C 4.22216 -3.87565 -2.58453  
C 3.14763 -4.38563 -3.32595  
C 1.84547 -3.91085 -3.10033  
C 3.37385 -5.39818 -4.31023  
H 1.02725 -4.32637 -3.67665  
H 4.81789 -2.48302 -1.06386  
H 5.22244 -4.24985 -2.76099  
C 0.03301 0.98316 1.18726  
C -1.21554 1.58261 1.23105  
C -2.13757 1.33973 0.20385  
C -1.79425 0.50260 -0.86995  
H 0.75002 1.15529 1.98004  
H -2.51768 0.33694 -1.65951  
C -3.42939 1.95203 0.24225  
H -1.48601 2.23290 2.05306  
N 3.55627 -6.21625 -5.10546  
N -4.47309 2.44659 0.27258

7i-TS3

C -0.00201 0.01361 -0.03023  
N 0.00722 0.01195 2.15062  
C 1.20755 0.02541 -0.33175  
N 2.22752 -0.05956 1.65018  
C -1.37574 -0.05350 -0.45375  
C 2.26014 0.01548 -1.30249  
C 1.95300 -0.52839 -2.57867  
C 0.56177 -1.03829 -2.86169  
C -0.52307 0.09972 -2.85625  
C -1.63879 -0.06519 -1.85186  
H 0.29431 -1.79337 -2.11774  
H 0.55191 -1.53786 -3.83215  
H -0.95903 0.17725 -3.85401  
H -0.02674 1.05547 -2.66487  
N 1.15304 -0.09756 2.29272

C 3.30943 -0.96183 2.06590  
H 3.77071 -0.61352 2.99415  
H 2.96093 -1.99087 2.19178  
H 4.05940 -0.93556 1.27787  
C -2.44778 -0.14173 0.44867  
C -3.75342 -0.25694 0.00086  
C -4.01539 -0.29047 -1.37425  
C -2.95406 -0.19376 -2.28498  
C 3.53408 0.55563 -1.06780  
C 4.50613 0.54380 -2.05446  
C 4.21811 -0.01796 -3.30571  
C 2.94100 -0.54080 -3.55649  
H 3.73947 1.00521 -0.10552  
H 5.48476 0.96770 -1.86762  
C 5.21863 -0.05175 -4.32660  
H 2.72435 -0.95819 -4.53286  
H -3.16927 -0.20832 -3.34698  
H -4.57124 -0.32461 0.70713  
C -5.35762 -0.41672 -1.85142  
H -2.24182 -0.12450 1.50843  
N 6.02857 -0.08131 -5.15030  
N -6.44172 -0.52055 -2.23763

8i

C 0.00805 -0.01936 0.01714  
N 0.00403 -0.00132 1.38364  
C 1.33081 -0.00910 -0.40596  
N 2.04701 -0.00631 0.75492  
C -1.24823 0.14105 -0.74240  
C 1.91070 -0.00038 -1.75309  
C 1.52791 -1.00129 -2.66625  
C 0.56209 -2.08913 -2.26045  
C -0.91740 -1.77012 -2.53689  
C -1.61097 -0.56055 -1.91201  
H 0.70080 -2.33577 -1.20668  
H 0.79822 -2.99582 -2.82493  
H -1.49580 -2.65327 -2.23846  
H -1.04562 -1.68909 -3.62081  
N 1.22370 -0.00905 1.82245  
C 3.48762 -0.03265 0.96582  
H 3.92001 0.96274 0.84877  
H 3.65267 -0.37852 1.98388  
H 3.95547 -0.71734 0.25881  
C -2.13135 1.10688 -0.22114  
C -3.32739 1.42171 -0.83578  
C -3.67055 0.76460 -2.02407  
C -2.81503 -0.21144 -2.53614  
C 2.82026 0.99232 -2.14400  
C 3.35232 1.00779 -3.42341  
C 2.97532 0.01473 -4.33730  
C 2.06889 -0.97952 -3.95056  
H 3.09320 1.77381 -1.44513  
H 4.04790 1.78117 -3.72293  
C 3.52128 0.01009 -5.66016  
H 1.79623 -1.74974 -4.66275  
H -3.10709 -0.73098 -3.44157  
H -3.98524 2.17250 -0.41721  
C -4.88865 1.07861 -2.70574  
H -1.84657 1.61195 0.69248  
N -5.87280 1.33039 -3.25599  
N 3.96510 0.00434 -6.72654

9

C 0.25640 0.69713 -0.15266  
C 0.40027 1.05197 1.21971  
C 0.91654 1.03972 2.31157  
C 1.95418 0.76897 3.29837  
C 2.77958 -0.45526 2.79324  
C 2.99064 -0.52391 1.25882  
C 1.84284 -1.22122 0.44806

C 1.05291 -0.40617 -0.56315  
C 1.03014 -0.76062 -1.91183  
C -0.53518 1.38444 -1.07857  
C -0.54208 1.00238 -2.41600  
C 0.24572 -0.06673 -2.83363  
H 1.55838 0.57319 4.29957  
H 2.60591 1.64630 3.38711  
H 2.28109 -1.37371 3.12001  
H 3.75136 -0.43506 3.29684  
H 3.17753 0.47904 0.86465  
H 3.90890 -1.09116 1.08163  
H -1.13472 2.22157 -0.74095  
H -1.15589 1.54039 -3.12934  
H 0.24851 -0.36571 -3.87581  
H 1.63172 -1.59934 -2.24732  
H 1.12559 -1.63808 1.16491  
H 2.26631 -2.07713 -0.08410

9-TS1

C 0.00800 0.00066 -0.03426  
N 0.01440 0.10326 2.18021  
C 1.20733 -0.02797 -0.33789  
N 2.22634 0.00874 1.66193  
C 2.32202 -0.00395 -1.29519  
C -1.37314 -0.01343 -0.44798  
C 1.93224 -0.64792 -2.64941  
C 0.50691 -0.32240 -3.14037  
C -0.60759 -1.24448 -2.54907  
C -1.67779 -0.57861 -1.71247  
C -3.00185 -0.54487 -2.15333  
C -2.39815 0.54786 0.32520  
C -3.70771 0.57311 -0.14019  
C -4.01227 0.02775 -1.38401  
H 3.20820 -0.50371 -0.89539  
H 2.60660 1.04301 -1.46133  
H 2.03823 -1.73522 -2.57167  
H 2.66538 -0.31933 -3.39336  
H 0.27430 0.72719 -2.93537  
H 0.49144 -0.42583 -4.22894  
H -2.15172 0.95892 1.29454  
H -4.48791 1.01450 0.46956  
H -5.03171 0.04123 -1.75311  
H -3.24488 -0.97909 -3.11788  
H -0.12910 -2.01803 -1.93801  
H -1.10221 -1.77033 -3.36966  
N 1.16666 0.12993 2.32028  
C 3.45826 0.61387 2.16343  
H 3.80650 0.11847 3.07492  
H 4.21321 0.46792 1.39146  
H 3.35133 1.68743 2.35245

9-TS2

C 0.01142 -0.00634 -0.00798  
N -0.00132 0.00376 2.29123  
C 1.22396 -0.01298 -0.24778  
N 2.19854 -0.00386 1.69301  
C 2.32171 0.00171 -1.22910  
C -1.36042 -0.02896 -0.42495  
C 1.97211 -0.82663 -2.48748  
C 0.55171 -0.59963 -3.04836  
C -0.57345 -1.46073 -2.38441  
C -1.65365 -0.71262 -1.63242  
C -2.96974 -0.69634 -2.09761  
C -2.38103 0.64225 0.26208  
C -3.68186 0.64752 -0.22755  
C -3.97897 -0.02534 -1.41003  
H 3.25600 -0.35604 -0.78890  
H 2.49977 1.04492 -1.51963  
H 2.09951 -1.89141 -2.26293  
H 2.71232 -0.58517 -3.25762

H 0.29567 0.46272 -2.98417  
H 0.56963 -0.83884 -4.11539  
H -2.12973 1.17105 1.17309  
H -4.45970 1.17724 0.31071  
H -4.99152 -0.02837 -1.79736  
H -3.20706 -1.22063 -3.01776  
H -0.10395 -2.17267 -1.69645  
H -1.05959 -2.06098 -3.15771  
N 1.24776 -0.07030 2.35606  
C -0.80153 -0.77374 3.23843  
H -1.83280 -0.71197 2.89364  
H -0.50244 -1.82638 3.26919  
H -0.74920 -0.35129 4.24676

9-P1

C -0.01480 0.23250 0.02304  
C -0.40868 0.09364 1.43257  
C 0.29865 0.45850 2.56635  
C 1.63154 1.11498 2.74070  
C 2.85077 0.17451 2.62398  
C 3.24118 -0.23795 1.19958  
C 2.18720 -1.04606 0.39904  
C 1.22177 -0.24546 -0.45509  
C 1.53764 -0.03041 -1.80298  
C -0.90726 0.85544 -0.86159  
C -0.57731 1.04889 -2.19599  
C 0.66034 0.61491 -2.66673  
H 1.65863 1.60788 3.71684  
H 1.72334 1.91105 1.99405  
H 2.67340 -0.72273 3.22869  
H 3.70964 0.68416 3.07390  
H 3.52459 0.65164 0.62546  
H 4.14659 -0.84880 1.27941  
H -1.86533 1.18627 -0.47891  
H -1.27928 1.53463 -2.86419  
H 0.93284 0.76050 -3.70614  
H 2.48315 -0.40290 -2.18491  
H 1.62748 -1.68961 1.08496  
H 2.72705 -1.71723 -0.27449  
N -0.54954 0.14997 3.58601  
N -1.71011 -0.36007 3.11204  
N -1.62801 -0.38878 1.81780  
C -0.37980 0.31769 5.01839  
H -1.28005 -0.07401 5.48711  
H 0.48885 -0.23874 5.37596  
H -0.26728 1.37286 5.27750

9-P2

C 0.04958 0.43698 0.00115  
C -0.29179 0.49939 1.42891  
C 0.50141 0.74614 2.53672  
C 1.96866 1.02780 2.61793  
C 2.87255 -0.21973 2.53787  
C 3.06037 -0.84327 1.14792  
C 1.78814 -1.40415 0.45460  
C 1.05677 -0.43860 -0.45654  
C 1.37395 -0.42299 -1.82063  
C -0.60319 1.28152 -0.91038  
C -0.27448 1.27536 -2.25950  
C 0.72409 0.41851 -2.71629  
H 2.13969 1.52418 3.57617  
H 2.25655 1.73627 1.83276  
H 2.48658 -0.97690 3.22985  
H 3.86447 0.05880 2.91036  
H 3.54039 -0.11853 0.48013  
H 3.77016 -1.66991 1.25760  
H -1.35832 1.96836 -0.54521  
H -0.78655 1.93910 -2.94640  
H 0.99211 0.40184 -3.76664  
H 2.14055 -1.09890 -2.18578

H 1.10587 -1.79435 1.21553  
H 2.08844 -2.25897 -0.15756  
N -0.28982 0.71310 3.64515  
N -1.51662 0.45819 3.29562  
N -1.54161 0.32857 1.95393  
C -2.79825 0.02329 1.29005  
H -3.23640 0.91734 0.84149  
H -2.63771 -0.72586 0.51454  
H -3.47348 -0.36493 2.04977

10

C 0.14610 -0.89680 -0.11342  
C 1.33640 -0.77711 -0.24655  
C 2.54179 -0.60098 -1.05220  
C -1.25725 -0.90326 -0.51113  
C 2.06317 -0.05625 -2.43143  
C 0.75684 -0.71915 -2.97801  
C -0.53536 0.08711 -2.81321  
C -1.44685 0.00859 -1.73210  
C -2.59663 0.80503 -1.75054  
C -0.84219 0.97303 -3.85620  
C -2.87701 1.67582 -2.79749  
C -1.98623 1.76345 -3.86007  
H -1.56345 -1.92981 -0.75389  
H -1.92325 -0.56925 0.28899  
H 3.05415 -1.56162 -1.17847  
H 3.26649 0.08535 -0.60480  
H 2.87114 -0.19701 -3.15650  
H 1.90243 1.02112 -2.34262  
H 0.64828 -1.71782 -2.55066  
H 0.88888 -0.86537 -4.05356  
H -3.28671 0.74149 -0.91526  
H -2.17910 2.43512 -4.68906  
H -3.77675 2.28016 -2.77698  
H -0.15722 1.03659 -4.69627

10-TS1

C 0.02418 0.10049 -0.10076  
N 0.11095 -0.08435 2.10315  
C 1.19836 0.09696 -0.46431  
N 2.31529 -0.18750 1.52755  
C 2.21242 0.02684 -1.52097  
C -1.41218 0.14589 -0.42285  
C 1.56677 0.42218 -2.87403  
C 0.14448 -0.17023 -3.11881  
C -1.00522 0.80572 -2.89301  
C -1.70672 0.96384 -1.67814  
C -2.73775 1.90642 -1.60642  
C -1.38203 1.60499 -3.98030  
C -3.09397 2.69300 -2.69685  
C -2.40751 2.54100 -3.89602  
H -1.76470 -0.88608 -0.55888  
H -1.98911 0.54885 0.41198  
H 2.60105 -0.99694 -1.57453  
H 3.07162 0.67375 -1.31915  
H 2.23864 0.09984 -3.67601  
H 1.50903 1.51211 -2.93295  
H 0.01362 -1.07255 -2.51696  
H 0.08799 -0.49197 -4.16229  
H -3.27019 2.02582 -0.66824  
H -2.66825 3.14081 -4.76098  
H -3.89705 3.41600 -2.60712  
H -0.85546 1.48174 -4.92201  
N 1.26584 -0.10750 2.20687  
C 3.56104 0.34411 2.07699  
H 3.47733 1.39935 2.35877  
H 3.89969 -0.23467 2.94210  
H 4.31173 0.24888 1.29314

10-TS2

C -0.01522 0.05436 -0.04823  
N -0.01675 -0.00933 2.27281  
C 1.19290 0.04068 -0.27598  
N 2.17995 0.03244 1.66798  
C 2.27558 -0.06475 -1.26702  
C -1.42669 -0.00113 -0.45017  
C 1.71792 0.17935 -2.68851  
C 0.35621 -0.52480 -2.97946  
C -0.85874 0.39511 -2.95010  
C -1.65956 0.64875 -1.81519  
C -2.73909 1.53169 -1.92788  
C -1.19243 1.04255 -4.14744  
C -3.05087 2.16570 -3.12547  
C -2.26759 1.91860 -4.24688  
H -1.74084 -1.05376 -0.47734  
H -2.07539 0.48649 0.28040  
H 2.71484 -1.06715 -1.20022  
H 3.08727 0.63530 -1.04995  
H 2.46534 -0.15996 -3.41286  
H 1.59924 1.25503 -2.84315  
H 0.22467 -1.36525 -2.29381  
H 0.40328 -0.95738 -3.98244  
H -3.34783 1.72631 -1.05057  
H -2.49103 2.39924 -5.19268  
H -3.89418 2.84493 -3.17813  
H -0.58810 0.84605 -5.02773  
C -0.82525 0.56006 3.34855  
H -1.86687 0.44868 3.04815  
H -0.68604 0.01800 4.28930  
H -0.61785 1.62335 3.51069  
N 1.23157 0.06761 2.33774

10-P1

C -0.06552 -0.11831 0.28632  
N -0.35780 0.65885 1.36436  
C 1.30718 -0.15921 0.12785  
N 1.76867 0.61821 1.14841  
C 2.18065 -0.87201 -0.85778  
C -1.13788 -0.73025 -0.56570  
C 1.97501 -0.50879 -2.34469  
C 0.65841 -1.00368 -3.00044  
C -0.52593 -0.05533 -2.95590  
C -1.38021 0.05703 -1.84240  
C -2.45507 0.94917 -1.89314  
C -0.78770 0.73479 -4.08159  
C -2.69826 1.73095 -3.01787  
C -1.85688 1.62413 -4.12033  
H -0.88165 -1.76875 -0.80072  
H -2.05391 -0.75282 0.02711  
H 2.03603 -1.95362 -0.74254  
H 3.22817 -0.68584 -0.60443  
H 2.80762 -0.96280 -2.89228  
H 2.06771 0.57314 -2.47819  
H 0.38907 -1.97364 -2.56782  
H 0.87367 -1.20147 -4.05389  
H -3.10502 1.03475 -1.02884  
H -2.03417 2.22151 -5.00762  
H -3.53894 2.41539 -3.03168  
H -0.14131 0.64211 -4.94909  
N 0.74719 1.10156 1.88862  
C 3.13196 0.94835 1.52458  
H 3.06515 1.60176 2.39184  
H 3.69338 0.05003 1.79053  
H 3.64420 1.47192 0.71474

10-P2

C 0.05164 -0.31039 0.23804  
N -0.19563 0.38178 1.38376  
C 1.42031 -0.20888 0.07666  
N 1.92068 0.52005 1.11392

C 2.30426 -0.75647 -0.99983  
C -0.99216 -0.94467 -0.63257  
C 2.03629 -0.24341 -2.42896  
C 0.74979 -0.77102 -3.11954  
C -0.52164 0.04092 -2.94373  
C -1.36148 -0.06495 -1.81774  
C -2.54101 0.68326 -1.76700  
C -0.89784 0.91755 -3.96837  
C -2.89734 1.55111 -2.79459  
C -2.06378 1.67400 -3.90063  
H -0.61158 -1.90991 -0.97973  
H -1.89043 -1.16056 -0.04905  
H 2.25342 -1.85323 -1.00706  
H 3.32785 -0.49762 -0.71785  
H 2.88608 -0.55658 -3.04438  
H 2.03652 0.85073 -2.43412  
H 0.58190 -1.80834 -2.80758  
H 0.94814 -0.81829 -4.19359  
H -3.19546 0.57875 -0.90728  
H -2.32392 2.34302 -4.71307  
H -3.81780 2.12023 -2.73187  
H -0.26248 0.99917 -4.84463  
C -1.45243 0.64212 2.06217  
H -1.96821 -0.29155 2.29614  
H -1.20639 1.15991 2.98681  
H -2.09990 1.27523 1.45205  
N 0.95066 0.87467 1.90336

11

C -0.20322 -0.01461 0.15232  
H -0.34375 0.23603 1.20863  
C 1.15469 -0.46800 -0.14358  
C 1.95075 -1.25060 -0.59621  
C 2.30828 -2.49386 -1.27743  
C 0.96941 -3.28056 -1.43279  
C -0.09319 -2.53803 -2.23701  
C -1.02872 -1.61434 -1.70553  
C -1.13186 -1.20609 -0.23918  
H -0.46291 0.87679 -0.42848  
H 3.02918 -3.09260 -0.71173  
H 2.75090 -2.29840 -2.25982  
H 0.60387 -3.51452 -0.42975  
H 1.17744 -4.23486 -1.92681  
H -2.16909 -0.92824 -0.02676  
H -0.88750 -2.04662 0.41534  
C -1.93672 -1.00918 -2.58443  
C -1.94559 -1.27383 -3.94951  
C -1.02939 -2.17960 -4.46994  
C -0.12599 -2.79840 -3.61310  
H -2.66163 -0.30987 -2.17870  
H -2.66662 -0.78375 -4.59417  
H -1.02101 -2.41121 -5.52913  
H 0.58050 -3.51491 -4.02094

11-TS

C -0.00285 -0.00439 -0.01844  
N 0.01376 -0.00254 2.20511  
C 1.17891 -0.00250 -0.35268  
N 2.24472 0.07549 1.71630  
C -1.41490 -0.03091 -0.42933  
H -1.88119 -0.96871 -0.10870  
C 2.22059 0.01125 -1.38431  
C 1.52897 0.14445 -2.77055  
C 0.57001 -0.99242 -3.09075  
C -0.79757 -1.00743 -2.73066  
C -1.49919 0.10936 -1.97277  
H -1.97888 0.77591 0.04925  
H 2.81390 -0.90936 -1.35169  
H 2.91495 0.84481 -1.23773  
H 2.30493 0.17683 -3.54185

H 1.01352 1.10766 -2.80025  
H -1.08817 1.08396 -2.24874  
H -2.55444 0.11923 -2.26368  
N 1.16489 -0.02041 2.34094  
C 3.45207 -0.51808 2.28800  
H 3.75743 -0.00642 3.20596  
H 3.33504 -1.58760 2.49303  
H 4.24216 -0.38736 1.54948  
C 1.09290 -2.09593 -3.77711  
C 0.31680 -3.20232 -4.10354  
C -1.02759 -3.21757 -3.74931  
C -1.56602 -2.12638 -3.07687  
H 2.13962 -2.07989 -4.06575  
H 0.75670 -4.03761 -4.63669  
H -1.65506 -4.06521 -4.00083  
H -2.61893 -2.13494 -2.81183

11-P

C -0.05272 -0.04005 0.03623  
H 0.04941 0.11843 1.11707  
C 1.29217 -0.01313 -0.62514  
C 2.14691 -1.05916 -0.91575  
C 2.01096 -2.52385 -0.65223  
C 1.07556 -3.30101 -1.63144  
C -0.05719 -2.55444 -2.32432  
C -0.97297 -1.70768 -1.66785  
C -0.85726 -1.34279 -0.20202  
H -0.61864 0.81347 -0.34700  
N 1.85538 1.14196 -1.07711  
N 3.00459 0.87674 -1.62545  
N 3.19700 -0.45764 -1.53987  
C 4.40686 -1.04042 -2.08956  
H 1.65232 -2.64624 0.37156  
H 2.99448 -3.00137 -0.67372  
H 0.66070 -4.15362 -1.08004  
H 1.69570 -3.73682 -2.41846  
H -1.86015 -1.19772 0.20954  
H -0.41907 -2.16499 0.36707  
H 5.00317 -0.21638 -2.47541  
H 4.17337 -1.73078 -2.90301  
H 4.97262 -1.56588 -1.31704  
C -2.01433 -1.13522 -2.40714  
C -2.16845 -1.37304 -3.76801  
C -1.26151 -2.20108 -4.41992  
C -0.22274 -2.77748 -3.69747  
H -2.71910 -0.48590 -1.89667  
H -2.98641 -0.91426 -4.31175  
H -1.35810 -2.39708 -5.48172  
H 0.48116 -3.42489 -4.21076

12

C -0.21045 -0.01614 0.13075  
H -0.33124 0.23747 1.18767  
C 1.13575 -0.48130 -0.17592  
C 1.98042 -1.22713 -0.60176  
C 2.27013 -2.49457 -1.27106  
C 0.94733 -3.26843 -1.43309  
C -0.10712 -2.53135 -2.24548  
C -1.05174 -1.61870 -1.71435  
C -1.14735 -1.20810 -0.24973  
H -0.46352 0.87476 -0.45132  
F 3.14912 -3.27221 -0.55333  
F 2.85399 -2.29846 -2.50015  
H 0.60188 -3.49812 -0.42366  
H 1.19721 -4.21494 -1.91927  
H -2.17906 -0.91874 -0.03058  
H -0.90609 -2.04586 0.40964  
C -1.96341 -1.02115 -2.59389  
C -1.95944 -1.28261 -3.95932  
C -1.02569 -2.17032 -4.47914

C -0.11889 -2.78286 -3.62267  
H -2.69812 -0.33138 -2.19025  
H -2.68221 -0.79973 -4.60678  
H -1.00280 -2.39014 -5.54012  
H 0.61035 -3.47513 -4.02813

12-TS1

C -0.00833 -0.00792 0.00949  
N -0.00395 0.00152 2.24401  
C 1.17226 -0.00987 -0.33321  
N 2.21767 0.06908 1.68868  
C -1.39413 -0.02200 -0.47272  
F -2.03062 -1.18016 -0.08493  
C 2.22300 0.00993 -1.35517  
C 1.55676 0.15889 -2.75221  
C 0.60978 -0.97767 -3.10076  
C -0.75798 -1.00550 -2.74871  
C -1.46409 0.10991 -2.00090  
F -2.12101 1.01098 0.07680  
H 2.81183 -0.91291 -1.31655  
H 2.91531 0.83980 -1.18270  
H 2.34936 0.20261 -3.50504  
H 1.04180 1.12252 -2.78175  
H -1.05783 1.09226 -2.24750  
H -2.52558 0.12075 -2.26060  
N 1.14788 -0.02665 2.33248  
C 3.39656 -0.65440 2.16949  
H 3.77149 -0.22576 3.10401  
H 3.20179 -1.72278 2.31140  
H 4.16718 -0.53213 1.40920  
C 1.14225 -2.07153 -3.79440  
C 0.37180 -3.17949 -4.12837  
C -0.97169 -3.20922 -3.77073  
C -1.52040 -2.12823 -3.09160  
H 2.18926 -2.04757 -4.08083  
H 0.81681 -4.00821 -4.66733  
H -1.59070 -4.06304 -4.02133  
H -2.56735 -2.14996 -2.81066

12-TS2

C 0.00406 0.00193 -0.00162  
N -0.00331 -0.00602 2.22685  
C 1.18512 0.00206 -0.33839  
N 2.22796 0.09283 1.71191  
C -1.39012 -0.02167 -0.43789  
F -2.02719 -1.17059 -0.02764  
C 2.21157 -0.00188 -1.38601  
C 1.52749 0.16132 -2.77168  
C 0.56411 -0.96395 -3.11242  
C -0.79729 -0.99273 -2.73368  
C -1.49108 0.11719 -1.96306  
F -2.11029 1.01798 0.13609  
H 2.77827 -0.93802 -1.34756  
H 2.93241 0.80530 -1.22378  
H 2.30695 0.20083 -3.53852  
H 1.02154 1.13045 -2.78899  
H -1.08967 1.10097 -2.21214  
H -2.55734 0.12812 -2.20254  
N 1.23396 0.12779 2.29985  
C 1.07681 -2.05112 -3.83136  
C 0.29537 -3.15053 -4.16728  
C -1.04115 -3.17984 -3.78522  
C -1.57108 -2.10698 -3.07885  
H 2.11850 -2.02826 -4.13615  
H 0.72682 -3.97274 -4.72677  
H -1.66922 -4.02622 -4.03821  
H -2.61325 -2.12806 -2.78040  
C -0.87673 0.79182 3.09156  
H -1.88849 0.62714 2.72925  
H -0.81218 0.45534 4.12989

H -0.64726 1.86003 3.03271

12-P1

C -0.02790 -0.02997 0.03073  
H 0.10144 0.13228 1.10744  
C 1.31129 -0.04157 -0.64076  
C 2.19391 -1.05294 -0.97341  
C 2.04089 -2.52207 -0.73373  
C 1.04678 -3.27877 -1.63415  
C -0.09238 -2.53148 -2.31056  
C -1.00365 -1.68580 -1.64661  
C -0.86255 -1.31724 -0.18570  
H -0.60023 0.82362 -0.34624  
N 1.94134 1.07408 -1.09468  
N 3.12734 0.76502 -1.67196  
N 3.27549 -0.52046 -1.59933  
F 1.67221 -2.70826 0.60180  
F 3.25647 -3.13610 -0.85537  
H 0.66201 -4.10865 -1.03156  
H 1.66362 -3.72132 -2.41716  
H -1.85412 -1.13841 0.23834  
H -0.42272 -2.13245 0.38501  
C -2.05849 -1.12327 -2.37450  
C -2.22817 -1.36936 -3.73213  
C -1.32264 -2.19326 -4.39153  
C -0.27151 -2.76116 -3.68073  
H -2.76553 -0.48229 -1.85632  
H -3.05895 -0.92355 -4.26699  
H -1.43162 -2.39577 -5.45069  
H 0.43089 -3.40531 -4.19882  
C 1.51635 2.46226 -1.03908  
H 0.57016 2.59738 -1.56697  
H 1.40871 2.79490 -0.00482  
H 2.29160 3.04586 -1.53064

12-P2

C -0.06900 -0.06029 0.05625  
H 0.06856 0.05119 1.13761  
C 1.26453 -0.03432 -0.62794  
C 2.13821 -1.05642 -0.94916  
C 2.00041 -2.52561 -0.70451  
C 0.98223 -3.29912 -1.56840  
C -0.10645 -2.53799 -2.30666  
C -1.02368 -1.67586 -1.67447  
C -0.92237 -1.32542 -0.20682  
H -0.60919 0.82725 -0.28295  
N 1.81540 1.13247 -1.05810  
N 2.96352 0.89046 -1.61888  
N 3.18316 -0.43514 -1.56685  
C 4.41976 -0.95833 -2.13699  
F 1.68654 -2.70568 0.63370  
F 3.23198 -3.13816 -0.86449  
H 0.54971 -4.05912 -0.90957  
H 1.58012 -3.83441 -2.30752  
H -1.92410 -1.14002 0.18976  
H -0.51812 -2.16208 0.36297  
H 4.94922 -0.10017 -2.54435  
H 4.20446 -1.67341 -2.93119  
H 5.01869 -1.44424 -1.36864  
C -2.03238 -1.08620 -2.44301  
C -2.14950 -1.32675 -3.80753  
C -1.24014 -2.17274 -4.43295  
C -0.23207 -2.76735 -3.68193  
H -2.74080 -0.42465 -1.95442  
H -2.94415 -0.85707 -4.37581  
H -1.31377 -2.37172 -5.49583  
H 0.47147 -3.43321 -4.17120
